# Supplementary material
Source: publisher figshare collection journal article supplement (https://tandf.figshare.com/ndownloader/files/21727185)
Supplement: Supplementary file 1 [file 21727185]

## Supplementary Material

### Picraquanines A—C, three new phenolic derivatives from the stems of *Picrasma quassioides*

Rui Xu,<sup>1, #</sup> Dongdong Zhang,<sup>1, #</sup> Fangfang Shu,<sup>2</sup> Zehai Long,<sup>1</sup> Yiming Li,<sup>1</sup> Zhengtao Wang,<sup>2</sup> Li Yang<sup>\*, 2, 3</sup> & Rui Wang<sup>\*, 1</sup>

<sup>1</sup> School of Pharmacy, Shanghai University of Traditional Chinese Medicine, Shanghai, 201203, People's Republic of China

<sup>2</sup> The MOE Key Laboratory of Standardization of Chinese Medicines, Shanghai Key Laboratory of Compound Chinese Medicines, and SATCM Key Laboratory of New Resources and Quality Evaluation of Chinese Medicines, Institute of Chinese Materia Medica, Shanghai, 201203, China

<sup>3</sup> Interdisciplinary Integrative Medicine Research, Shanghai University of Traditional Chinese Medicine, Shanghai 201203, People's Republic of China

<sup>#</sup> These authors contribute equally to this work

<sup>\*</sup> **Corresponding Author**

E-mail: wr@shutcm.edu.cn (Rui Wang), Tel: 86 21 51322181, Fax: 86 21 51322193.

E-mail: yl7@shutcm.edu.cn (Li Yang), Tel: 86 21 51322507, Fax: 86 21 51322505.

**ABSTRACT:** Three new phenolic derivatives, picraquanines A - C (**1 - 3**), along with 6 known ones **4 - 9** were obtained from the stems of *Picrasma quassioides* (D. Don) Benn. The new structures were determined by extensive spectroscopic data analysis, including IR, HRESIMS, <sup>1</sup>H-NMR, <sup>13</sup>C-NMR, HSQC, HMBC, <sup>1</sup>H-<sup>1</sup>H COSY experiments.

The absolute configuration of **1** was determined by comparison of its experimental and calculated ECD spectra. Furthermore, all the compounds were tested for their nitric oxide (NO) inhibitory effects against LPS-stimulated RAW 264.7 cells, however, none of them exhibited inhibitory effects ( $IC_{50} > 100 \mu M$ ).

**Key words:** *Picrasma quassioides*; structure determination; Picraquanines A–C; NO inhibitory activity

### Extraction and isolation

The air-dried stems of *Picrasma quassioides* (D. Don) Benn. (9.3 Kg) were extracted with 80% EtOH under reflux two times. After removing the solvent under reduced pressure, the concentrated residue was dissolved with EtOH, and then adjust pH 9 with NaOH. After filtered and concentrated, the concentration was extract with 2% HCl for four times, and then adjusted pH 5.0 ~ 6.0 with NaOH, finally, the concentrated extract (200 g) was obtained. The extract (200 g) was subjected to column chromatography (CC, 10\*110 cm) on silica gel (2.0 Kg), eluting with a gradient solvent system ( $CH_2Cl_2$ -MeOH, 20:1 – 1:1) to give eleven fractions (F1 – F11); F1 (16 g) was subjected to CC (5\*60 cm) on RP- $C_{18}$  (100 g) eluting with MeOH- $H_2O$  (5% – 60%) to give fourteen subfractions (F1-1 – F1-14). F1-3 (1.8 g) was purified by HPLC with MeCN-0.02%TFA/ $H_2O$  (13:87) to afford **5** (9.5 mg,  $t_R$  = 11.5 min), **2** (12 mg,  $t_R$  = 20.5 min), **8** (12 mg,  $t_R$  = 21.8 min) and **9** (10 mg,  $t_R$  = 23.5 min). F1-5 (2.2 g) was purified by HPLC with MeCN-0.02%TFA/ $H_2O$  (30:70) to afford **3** (2 mg,  $t_R$  = 14.2 min). F2 (24 g) was subjected to CC (5\*60 cm) on RP- $C_{18}$  (100 g) eluting with MeOH- $H_2O$  (5% – 60%) to give eight subfractions (F2-1 – F2-8). F2-2 (2.0 g) was purified by HPLC with MeCN-0.02%TFA/ $H_2O$  (8:92) to afford **4** (4.0 mg,  $t_R$  = 15.6 min), **6** (1.7 mg,  $t_R$  = 16.5 min), **1** (3.2 mg,  $t_R$  = 21.8 min) and **7** (3.0 mg,  $t_R$  = 36.1 min).

### Inhibitory assay of NO production

Cytotoxicity was examined using the Cell Counting Kit-8 (CCK-8). The absorbance at 450 nm was measured using a microplate reader (Thermo Fisher Scientific).

Viability was defined as the ratio (expressed as a percentage) of absorbance values of treated cells to untreated cells. Compounds 1–9 were dissolved in dimethyl sulfoxide (DMSO) and diluted with complete medium to 6 degrees of concentration ( $0.1 \mu\text{mol}\cdot\text{L}^{-1}$ ,  $1 \mu\text{mol}\cdot\text{L}^{-1}$ ,  $10 \mu\text{mol}\cdot\text{L}^{-1}$ ,  $25 \mu\text{mol}\cdot\text{L}^{-1}$ ,  $50 \mu\text{mol}\cdot\text{L}^{-1}$ ,  $100 \mu\text{mol}\cdot\text{L}^{-1}$ ) for inhibition rate determination. RAW 264.7 cells were maintained in Dulbecco's modified Eagle's medium (high-glucose condition) supplemented with 10% fetal calf serum, 100 U/ml penicillin, and 100  $\mu\text{g}/\text{mL}$  streptomycin at  $37^\circ\text{C}$  in 5%  $\text{CO}_2$ . RAW 264.7 cells were pre-treated with each tested compound for 30 min, and then stimulated with lipopolysaccharide (LPS) ( $100 \text{ ng}/\text{mL}$ ) for 24 h. Aminoguanidine hydrochloride ( $100 \mu\text{M}$ ) was used as a positive control. The NO production was measured using the Griess reagent. Briefly, cell culture supernatant was reacted with equal volumes of Griess reagent in a 96-well plate for 10 min, and then the absorbance at 540 nm was measured by a plate reader. All experiments were performed in triplicate. All of the tested compounds were prepared as stock solutions with a concentration of 100 mM in DMSO.

## List of Content

| No. | Content                                                                                      |
|-----|----------------------------------------------------------------------------------------------|
| 1   | Figure S1. The IR spectrum of <b>1</b> (in KBr)                                              |
| 2   | Figure S2. The HRESIMS spectrum of <b>1</b> (in MeOH)                                        |
| 3   | Figure S3. The $^1\text{H}$ NMR spectrum of <b>1</b> (in $\text{DMSO}-d_6$ )                 |
| 4   | Figure S4. The $^{13}\text{C}$ NMR spectrum of <b>1</b> (in $\text{DMSO}-d_6$ )              |
| 5   | Figure S5. The DEPT 135 spectrum of <b>1</b> (in $\text{DMSO}-d_6$ )                         |
| 6   | Figure S6. The HSQC spectrum of <b>1</b> (in $\text{DMSO}-d_6$ )                             |
| 7   | Figure S7. The HMBC spectrum of <b>1</b> (in $\text{DMSO}-d_6$ )                             |
| 8   | Figure S8. The $^1\text{H}$ - $^1\text{H}$ COSY spectrum of <b>1</b> (in $\text{DMSO}-d_6$ ) |

|    |                                                                                                                             |
|----|-----------------------------------------------------------------------------------------------------------------------------|
| 9  | Figure S9. The IR spectrum of <b>2</b> (in KBr)                                                                             |
| 10 | Figure S10. The HRESIMS spectrum of <b>2</b> (in MeOH)                                                                      |
| 11 | Figure S11. The $^1\text{H}$ NMR spectrum of <b>2</b> (in DMSO- $d_6$ )                                                     |
| 12 | Figure S12. The $^{13}\text{C}$ NMR spectrum of <b>2</b> (in DMSO- $d_6$ )                                                  |
| 13 | Figure S13. The DEPT 135 spectrum of <b>2</b> (in DMSO- $d_6$ )                                                             |
| 14 | Figure S14. The HSQC spectrum of <b>2</b> (in DMSO- $d_6$ )                                                                 |
| 15 | Figure S15. The HMBC spectrum of <b>2</b> (in DMSO- $d_6$ )                                                                 |
| 16 | Figure S16. The $^1\text{H}$ - $^1\text{H}$ COSY spectrum of <b>2</b> (in DMSO- $d_6$ )                                     |
| 17 | Figure S17. The IR spectrum of <b>3</b> (in KBr)                                                                            |
| 18 | Figure S18. The HRESIMS spectrum of <b>3</b> (in MeOH)                                                                      |
| 19 | Figure S19. The $^1\text{H}$ NMR spectrum of <b>3</b> (in DMSO- $d_6$ )                                                     |
| 20 | Figure S20. The $^{13}\text{C}$ NMR spectrum of <b>3</b> (in DMSO- $d_6$ )                                                  |
| 21 | Figure S21. The DEPT 135 spectrum of <b>3</b> (in DMSO- $d_6$ )                                                             |
| 22 | Figure S22. The HSQC spectrum of <b>3</b> (in DMSO- $d_6$ )                                                                 |
| 23 | Figure S23. The HMBC spectrum of <b>3</b> (in DMSO- $d_6$ )                                                                 |
| 24 | Figure S24. The $^1\text{H}$ - $^1\text{H}$ COSY spectrum of <b>3</b> (in DMSO- $d_6$ )                                     |
| 25 | Figure S25. The Key $^1\text{H}$ - $^1\text{H}$ COSY and HMBC correlations of <b>1</b> - <b>3</b>                           |
| 26 | Figure S26. b3lyp/6-31g(d) optimized lowest energy conformers for (2 <i>S</i> )- <b>1</b> and their equilibrium populations |
| 27 | Figure S27. Experimental and calculated ECD spectra of <b>1</b>                                                             |
| 28 | Table S1 $^1\text{H}$ and $^{13}\text{C}$ NMR data of <b>1</b>                                                              |
| 29 | Table S2 $^1\text{H}$ and $^{13}\text{C}$ NMR data of <b>2</b>                                                              |
| 30 | Table S3 $^1\text{H}$ and $^{13}\text{C}$ NMR data of <b>3</b>                                                              |



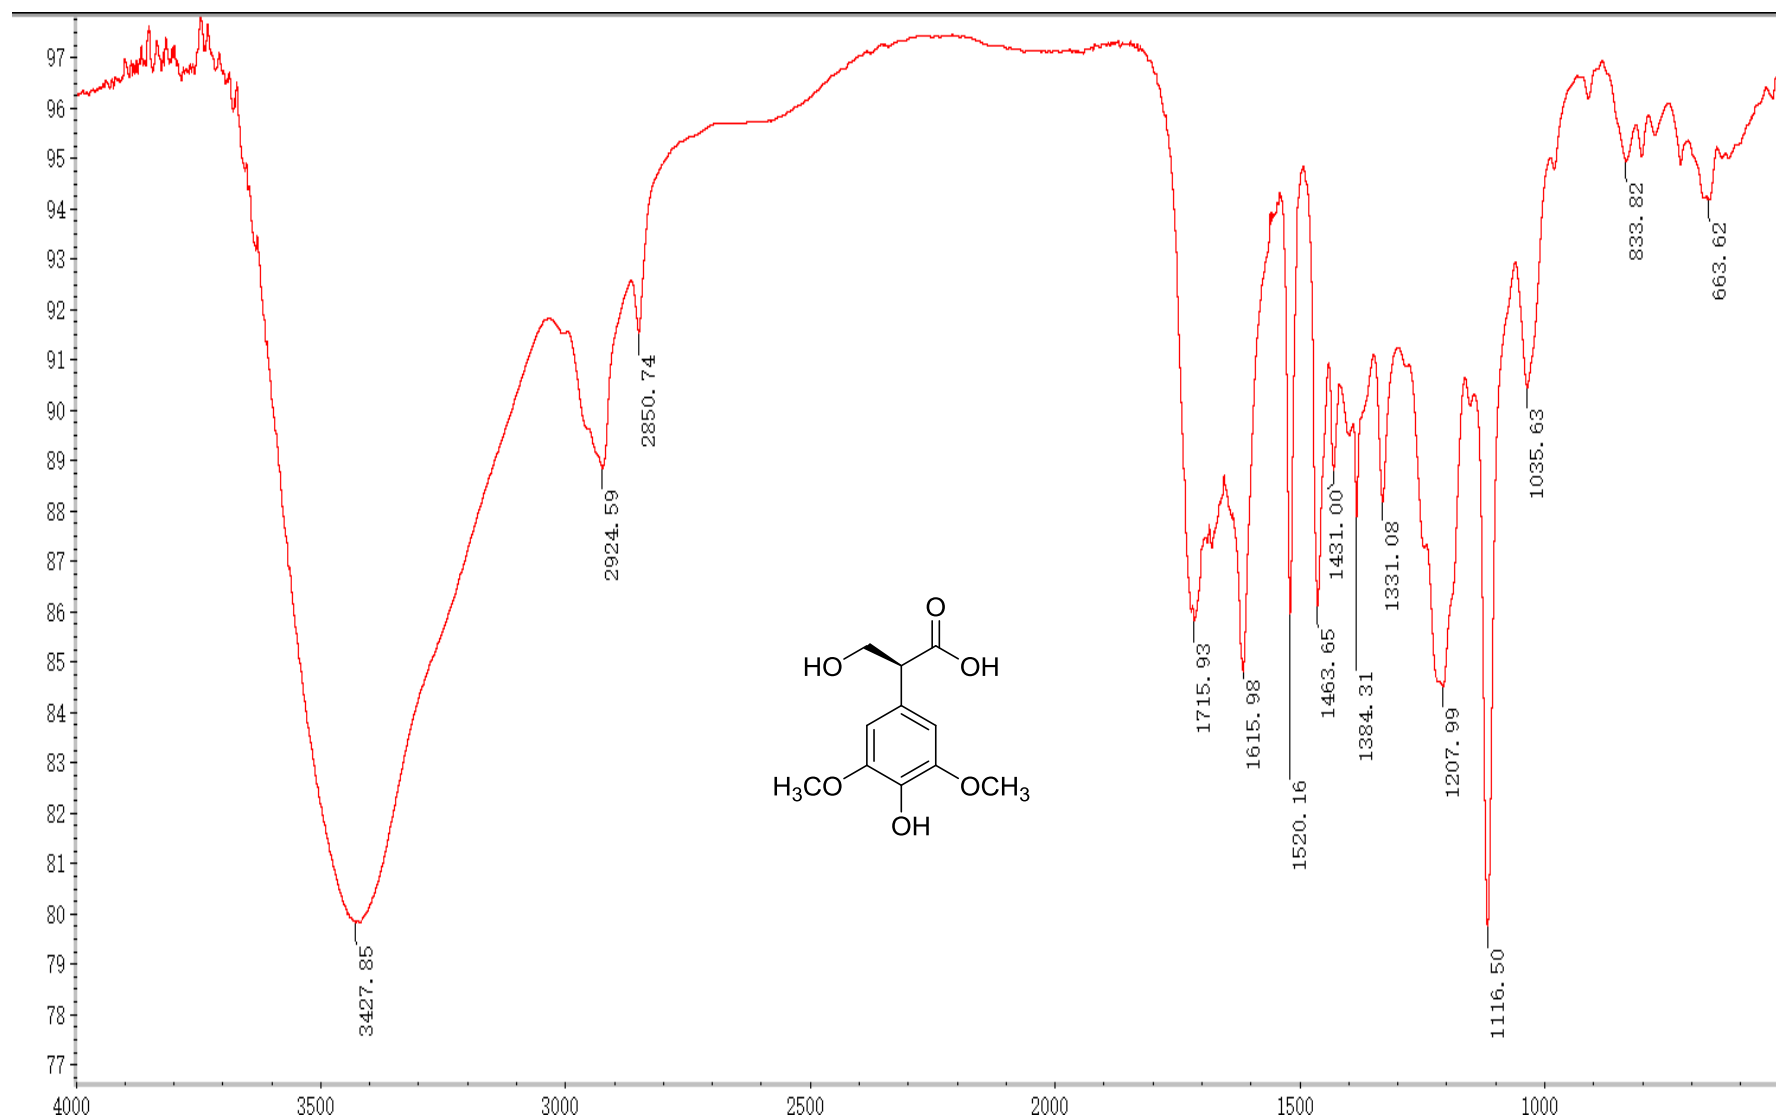

Figure S1. The IR spectrum of **1** (in KBr)

## Qualitative Analysis Report

|                 |                                        |                        |                              |
|-----------------|----------------------------------------|------------------------|------------------------------|
| Data Filename   | ESI_H_20190923_ZWL_LZH_N_13.d          | Sample Name            | KM-22                        |
| Sample Type     | Sample                                 | Position               | P1-C3                        |
| Instrument Name | Agilent G6520 Q-TOF                    | Acq Method             | 20160324_MS_ESI_H_NEG_1min.m |
| Acquired Time   | 9/23/2019 16:03:45                     | IRM Calibration Status | Success                      |
| DA Method       | small molecular data analysis method.m | Comment                | ESI_H by ZZY                 |

### User Spectra

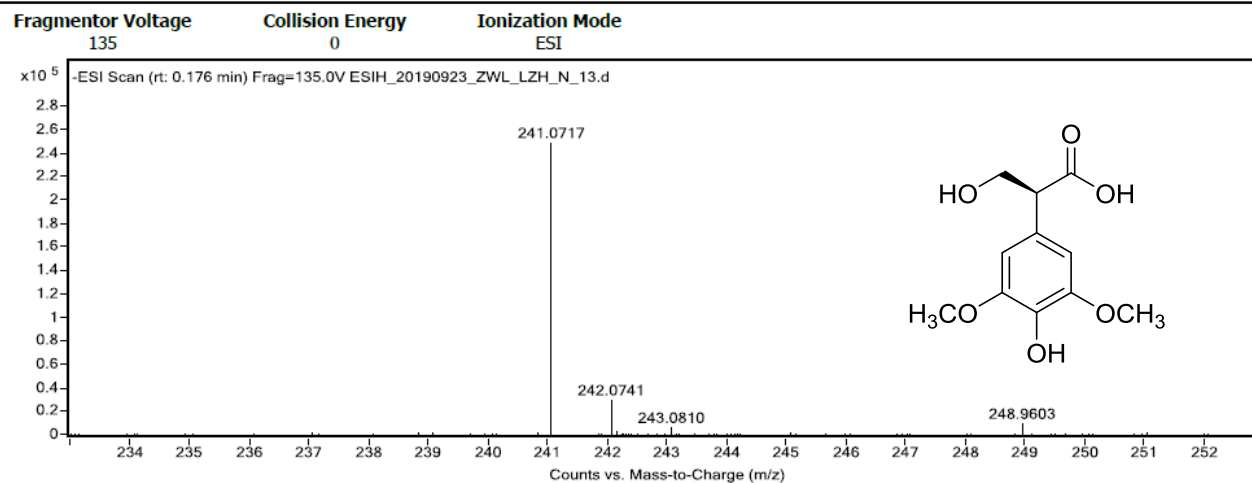

### Formula Calculator Results

| m/z      | Calc m/z | Diff (mDa) | Diff (ppm) | Ion Formula | Ion                |
|----------|----------|------------|------------|-------------|--------------------|
| 241.0717 | 241.0718 | 0.05       | 0.2        | C11 H13 O6  | (M-H) <sup>-</sup> |

--- End Of Report ---

Figure S2. The HRESIMS spectrum of **1** (in MeOH)

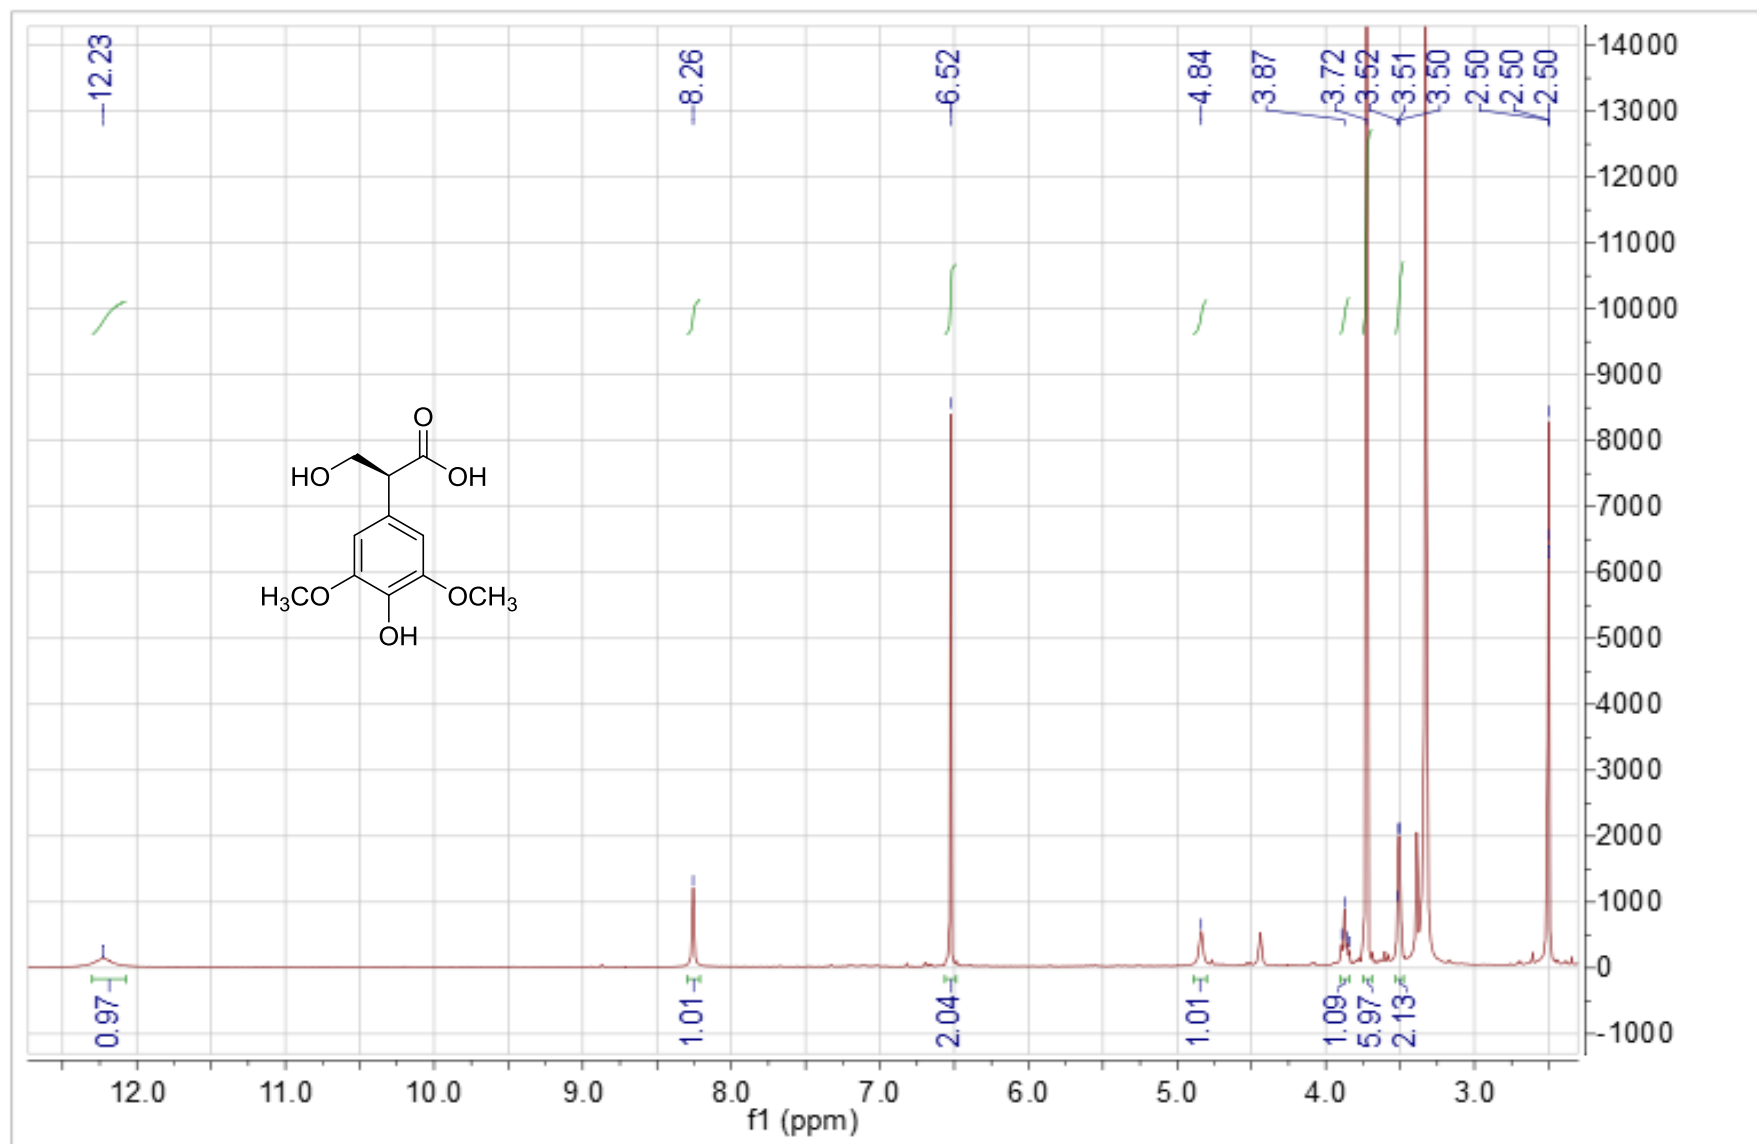

Figure S3. The  $^1\text{H}$  NMR spectrum of **1** (in  $\text{DMSO}-d_6$ )



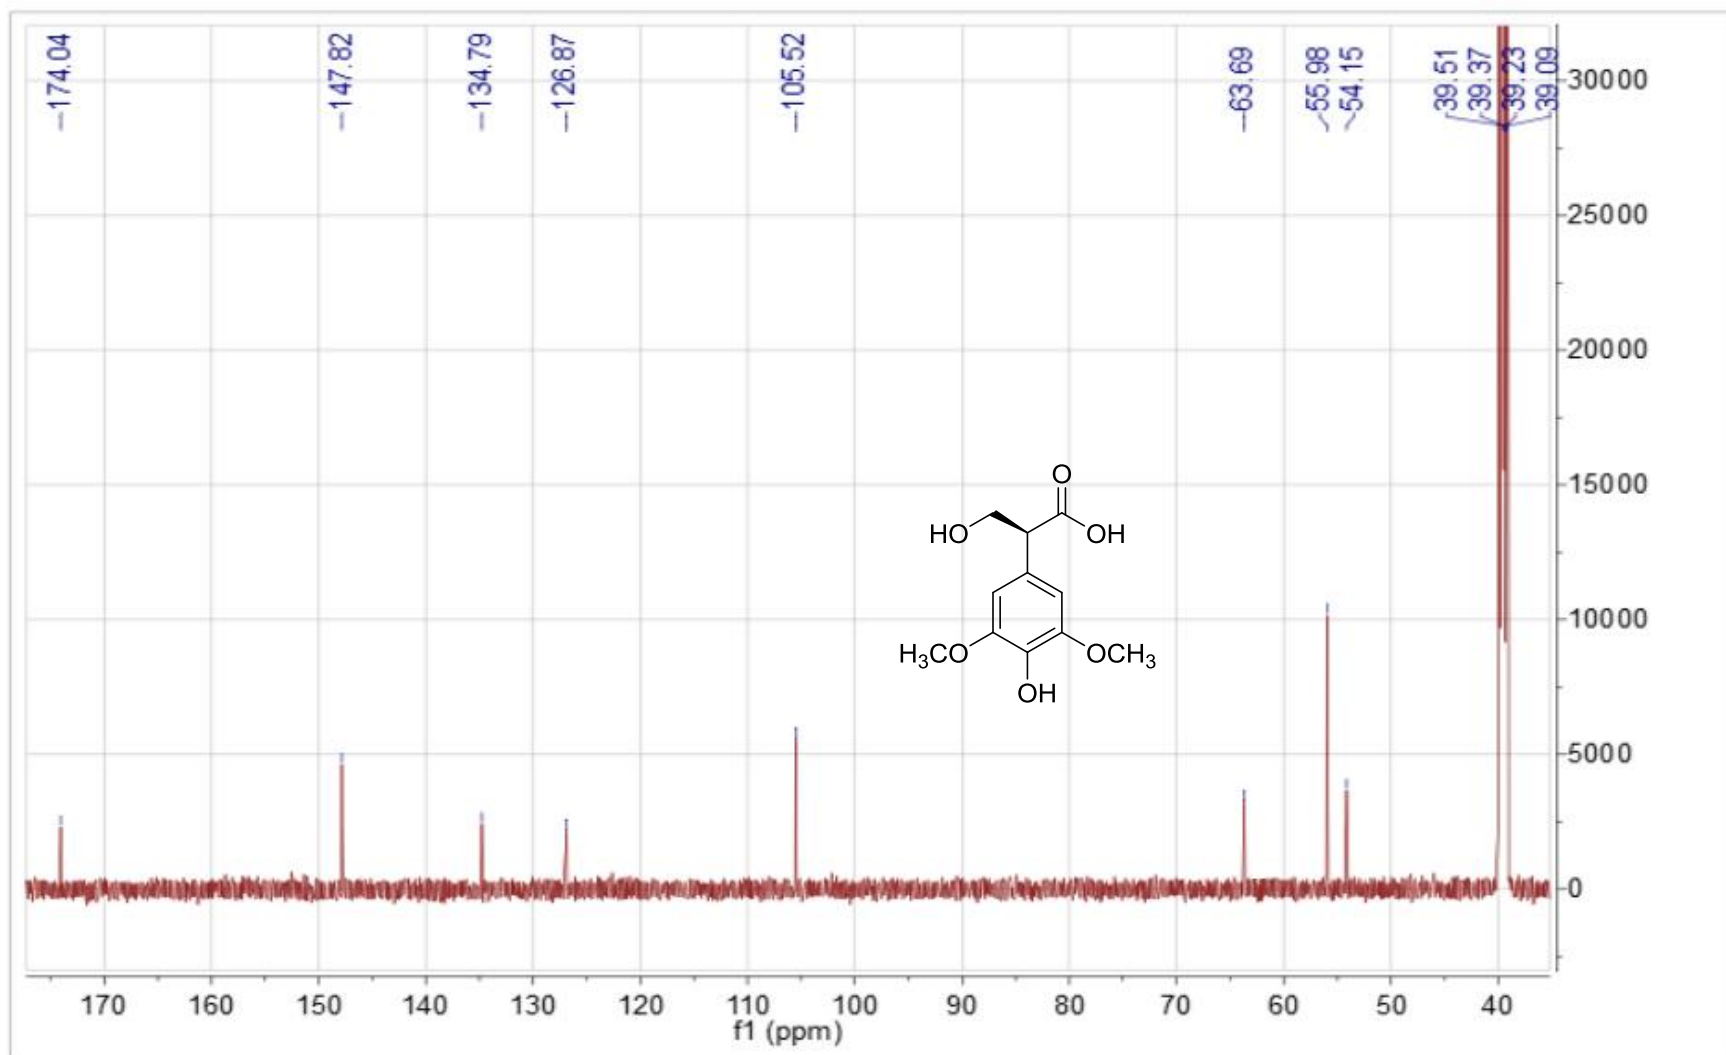

Figure S4. The  $^{13}\text{C}$  NMR spectrum of **1** (in  $\text{DMSO-}d_6$ )

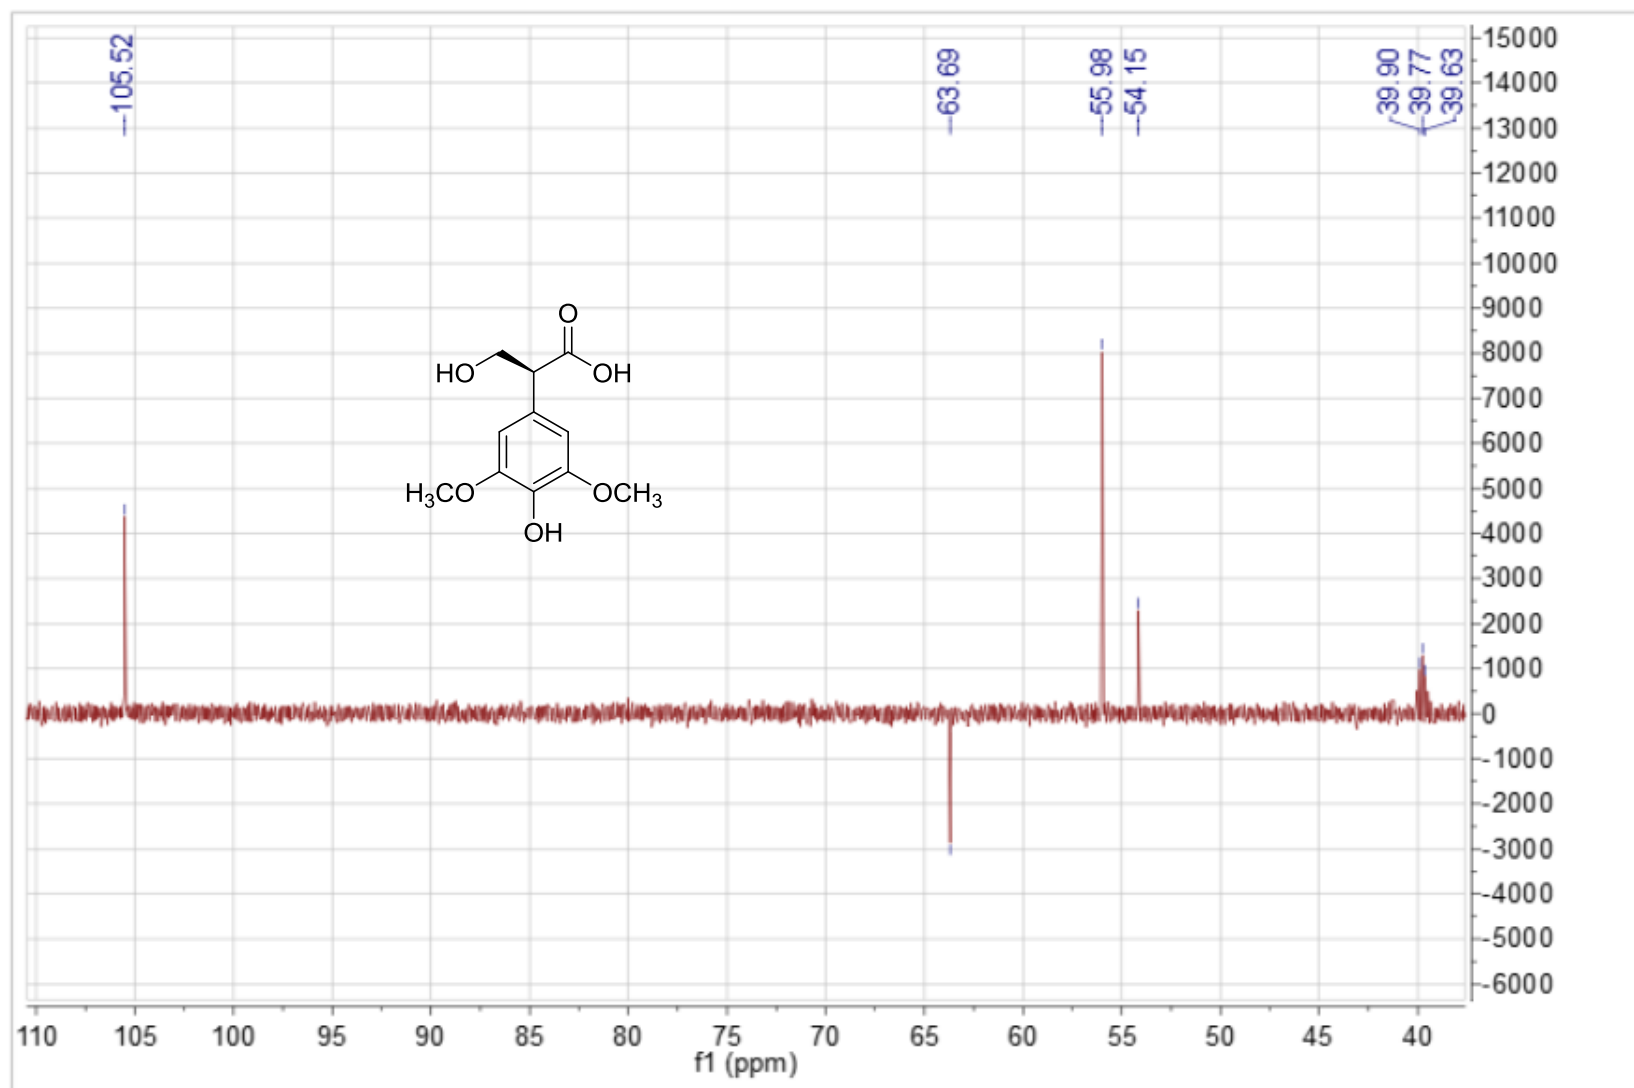

Figure S5. The DEPT 135 spectrum of **1** (in DMSO-*d*<sub>6</sub>)

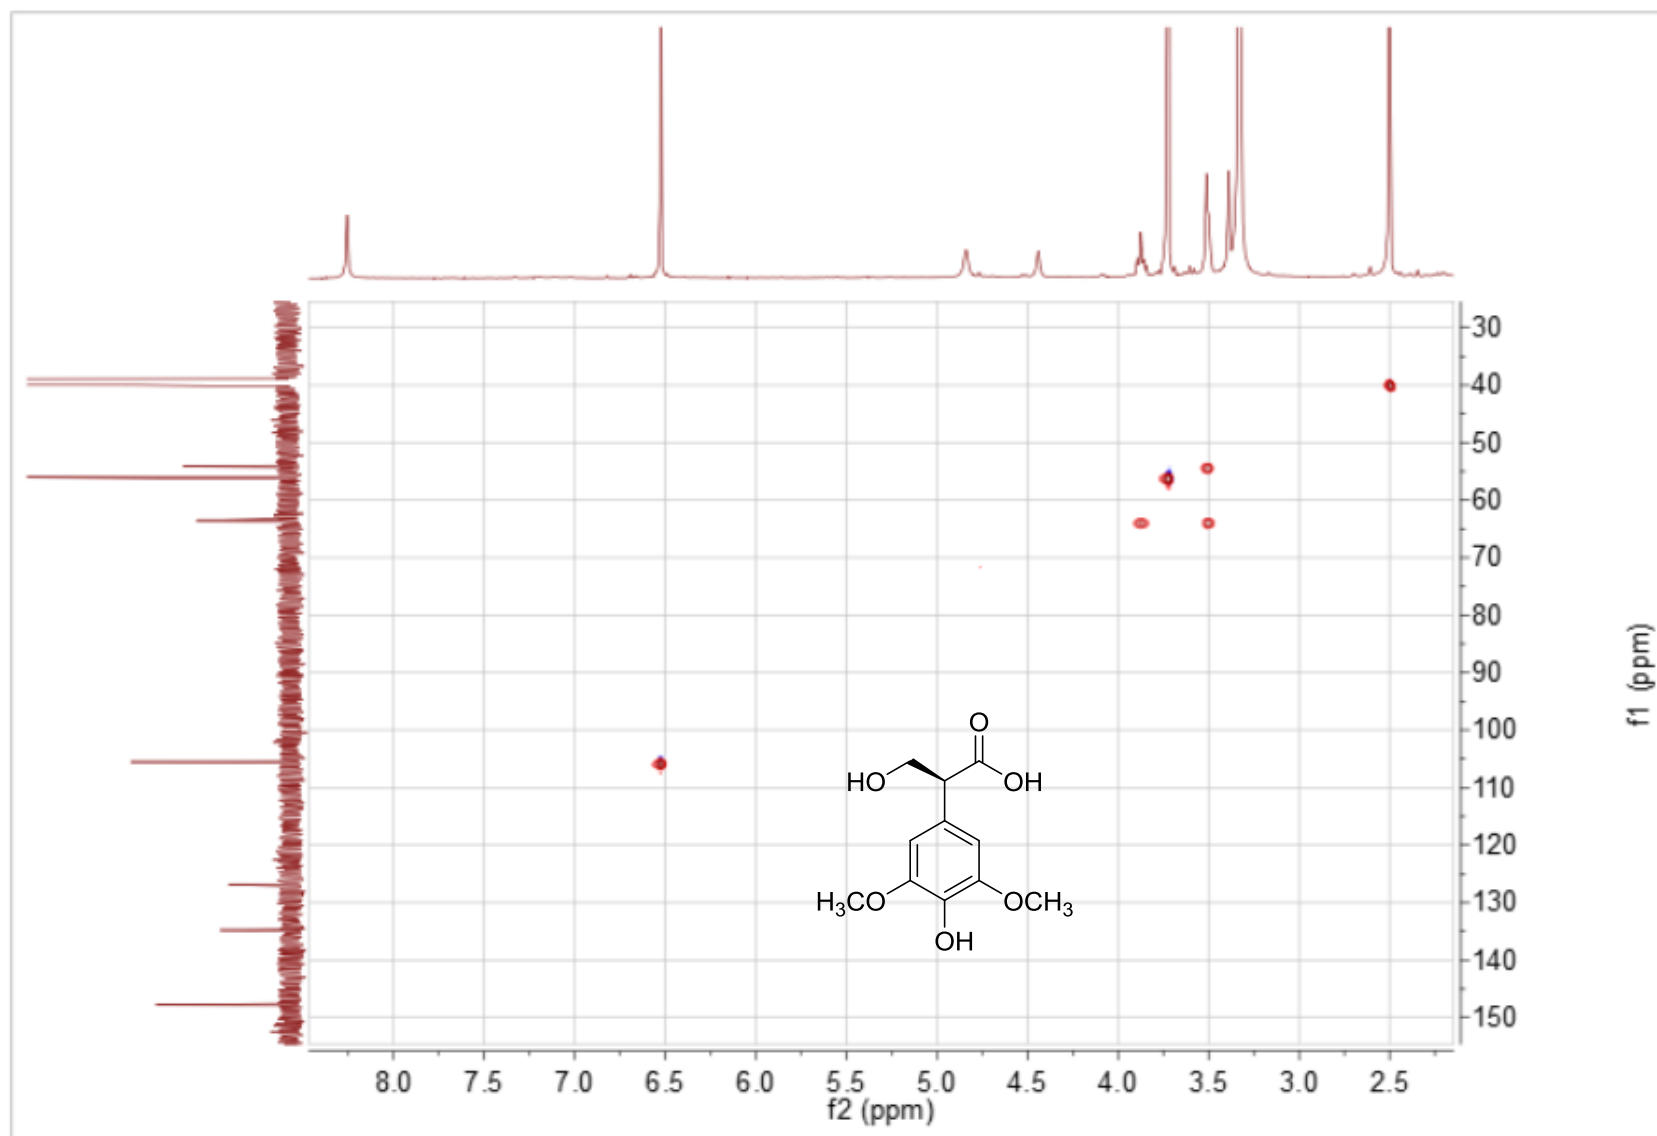

Figure S6. The HSQC spectrum of **1** (in DMSO- $d_6$ )

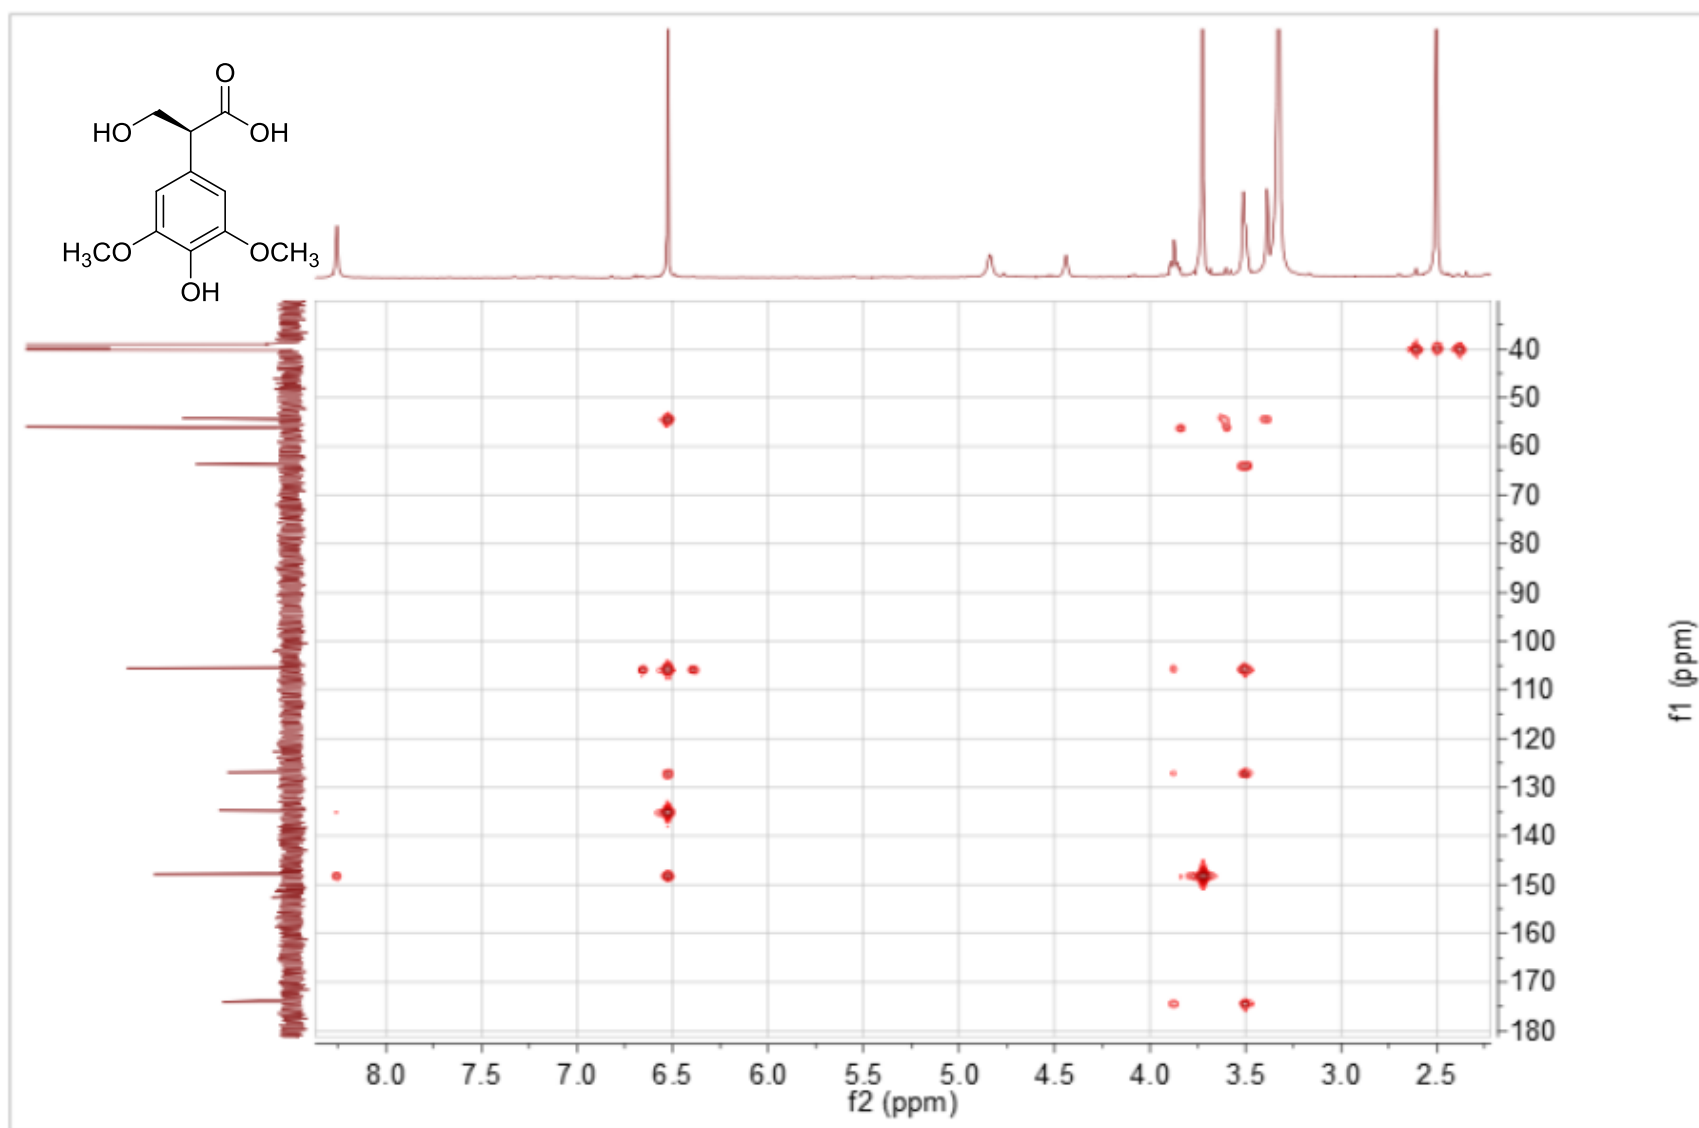

Figure S7. The HMBC spectrum of **1** (in DMSO- $d_6$ )

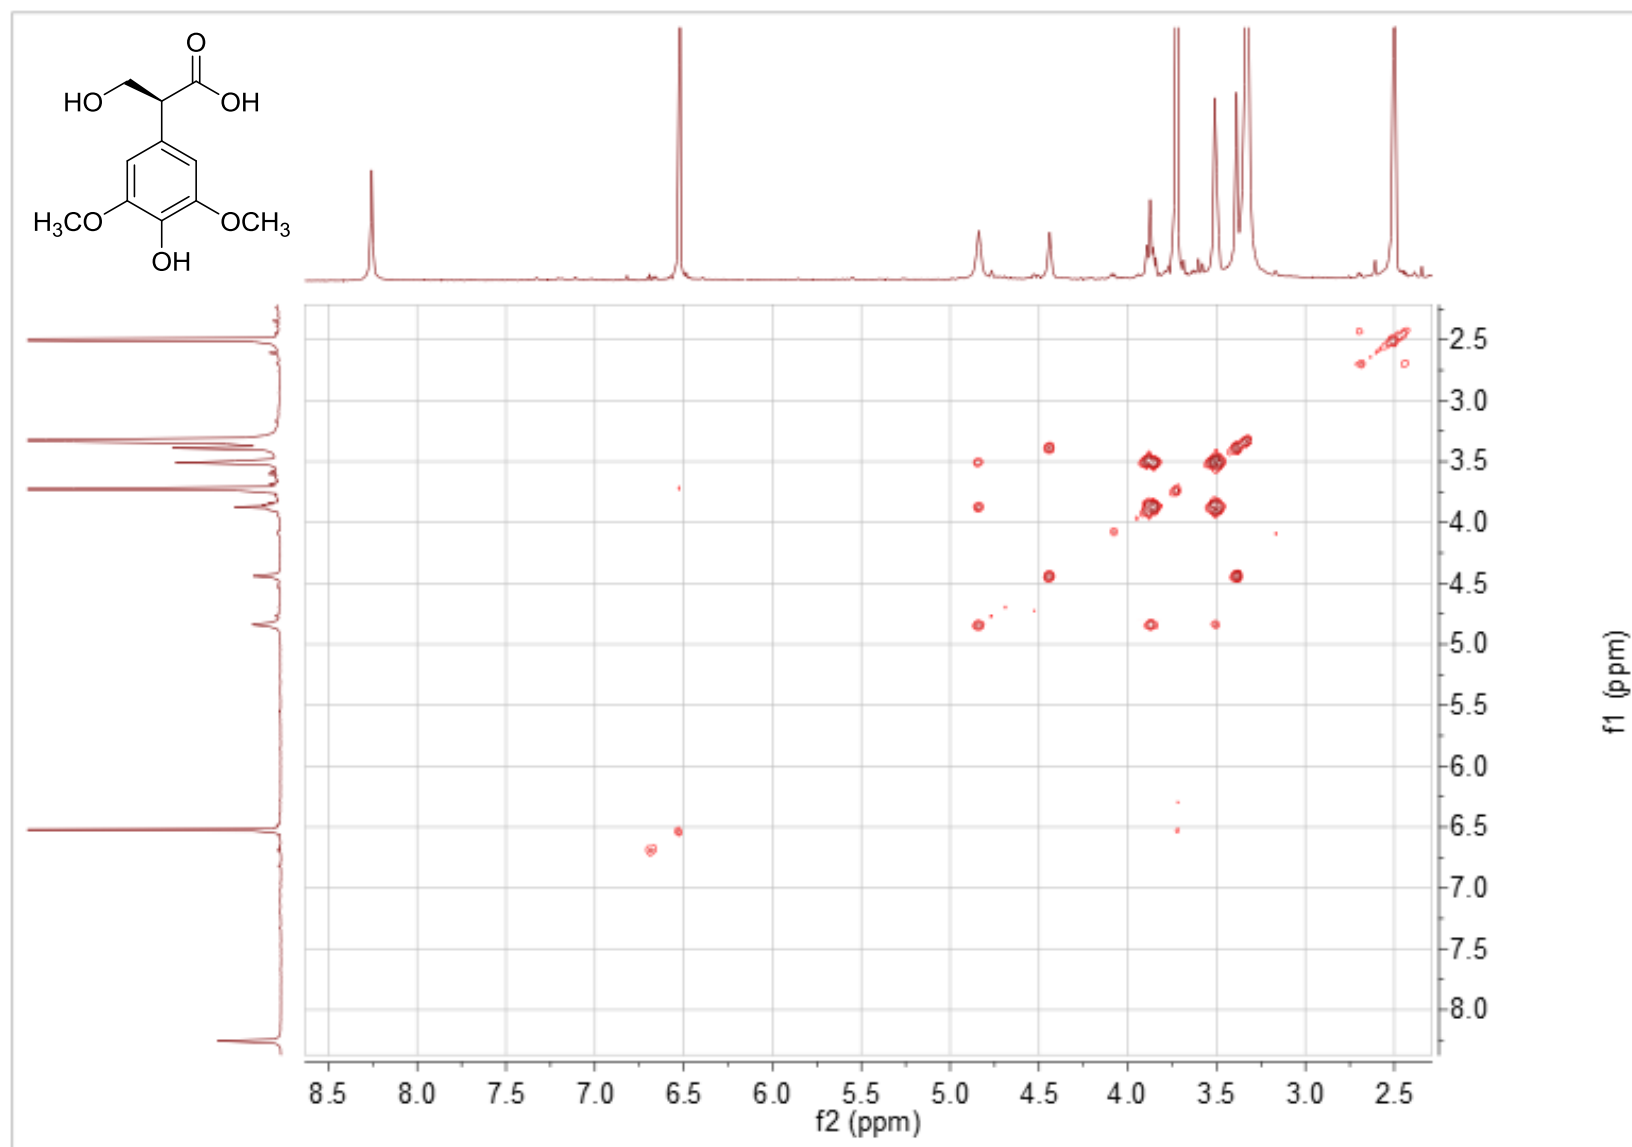

Figure S8. The  $^1\text{H}$ - $^1\text{H}$  COSY spectrum of **1** (in  $\text{DMSO-}d_6$ )

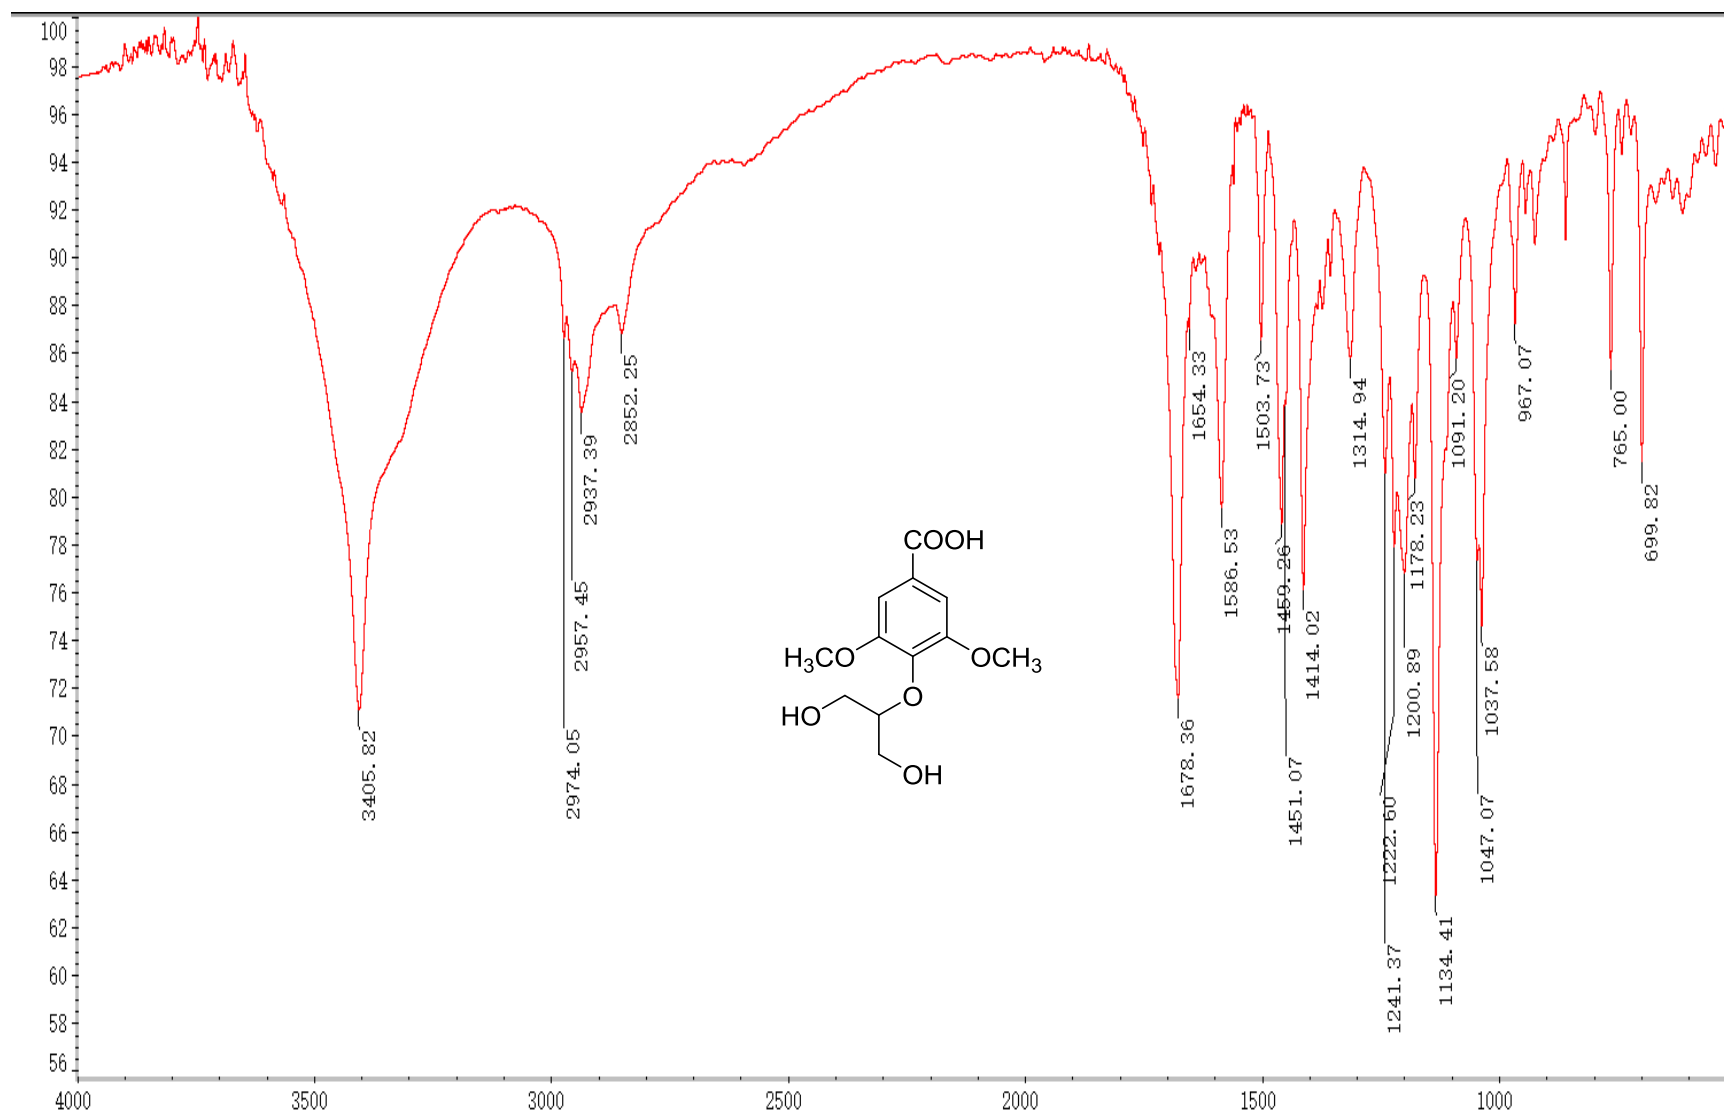

Figure S9. The IR spectrum of **2** (in KBr)

## Qualitative Analysis Report

|                        |                                        |                               |                              |
|------------------------|----------------------------------------|-------------------------------|------------------------------|
| <b>Data Filename</b>   | ESI_H_20190923_ZWL_LZH_N_14.d          | <b>Sample Name</b>            | KM-29                        |
| <b>Sample Type</b>     | Sample                                 | <b>Position</b>               | P1-C4                        |
| <b>Instrument Name</b> | Agilent G6520 Q-TOF                    | <b>Acq Method</b>             | 20160324_MS_ESI_H_NEG_1min.m |
| <b>Acquired Time</b>   | 9/23/2019 16:05:15                     | <b>IRM Calibration Status</b> | Success                      |
| <b>DA Method</b>       | small molecular data analysis method.m | <b>Comment</b>                | ESI_H by ZZY                 |

### User Spectra

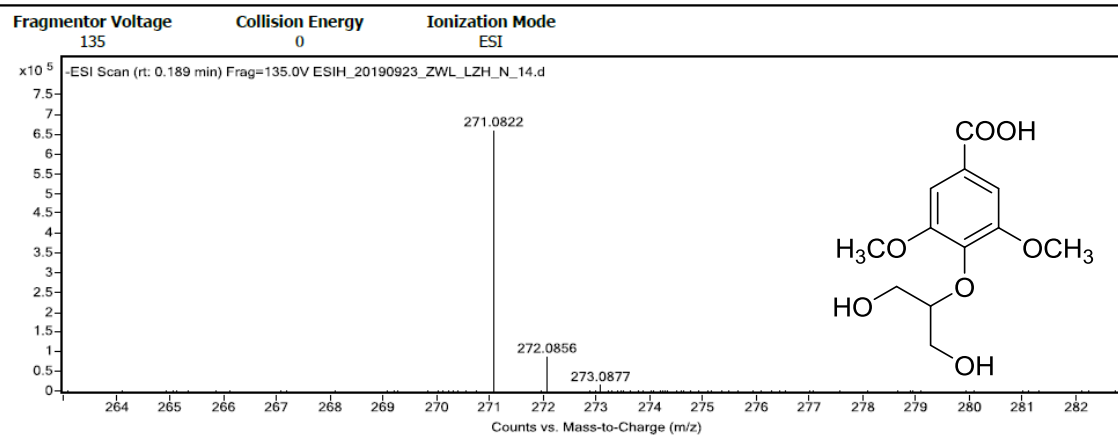

### Formula Calculator Results

| m/z      | Calc m/z | Diff (mDa) | Diff (ppm) | Ion Formula | Ion    |
|----------|----------|------------|------------|-------------|--------|
| 271.0822 | 271.0823 | 0.12       | 0.45       | C12 H15 O7  | (M-H)- |

--- End Of Report ---

Figure S10. The HRESIMS spectrum of **2** (in MeOH)

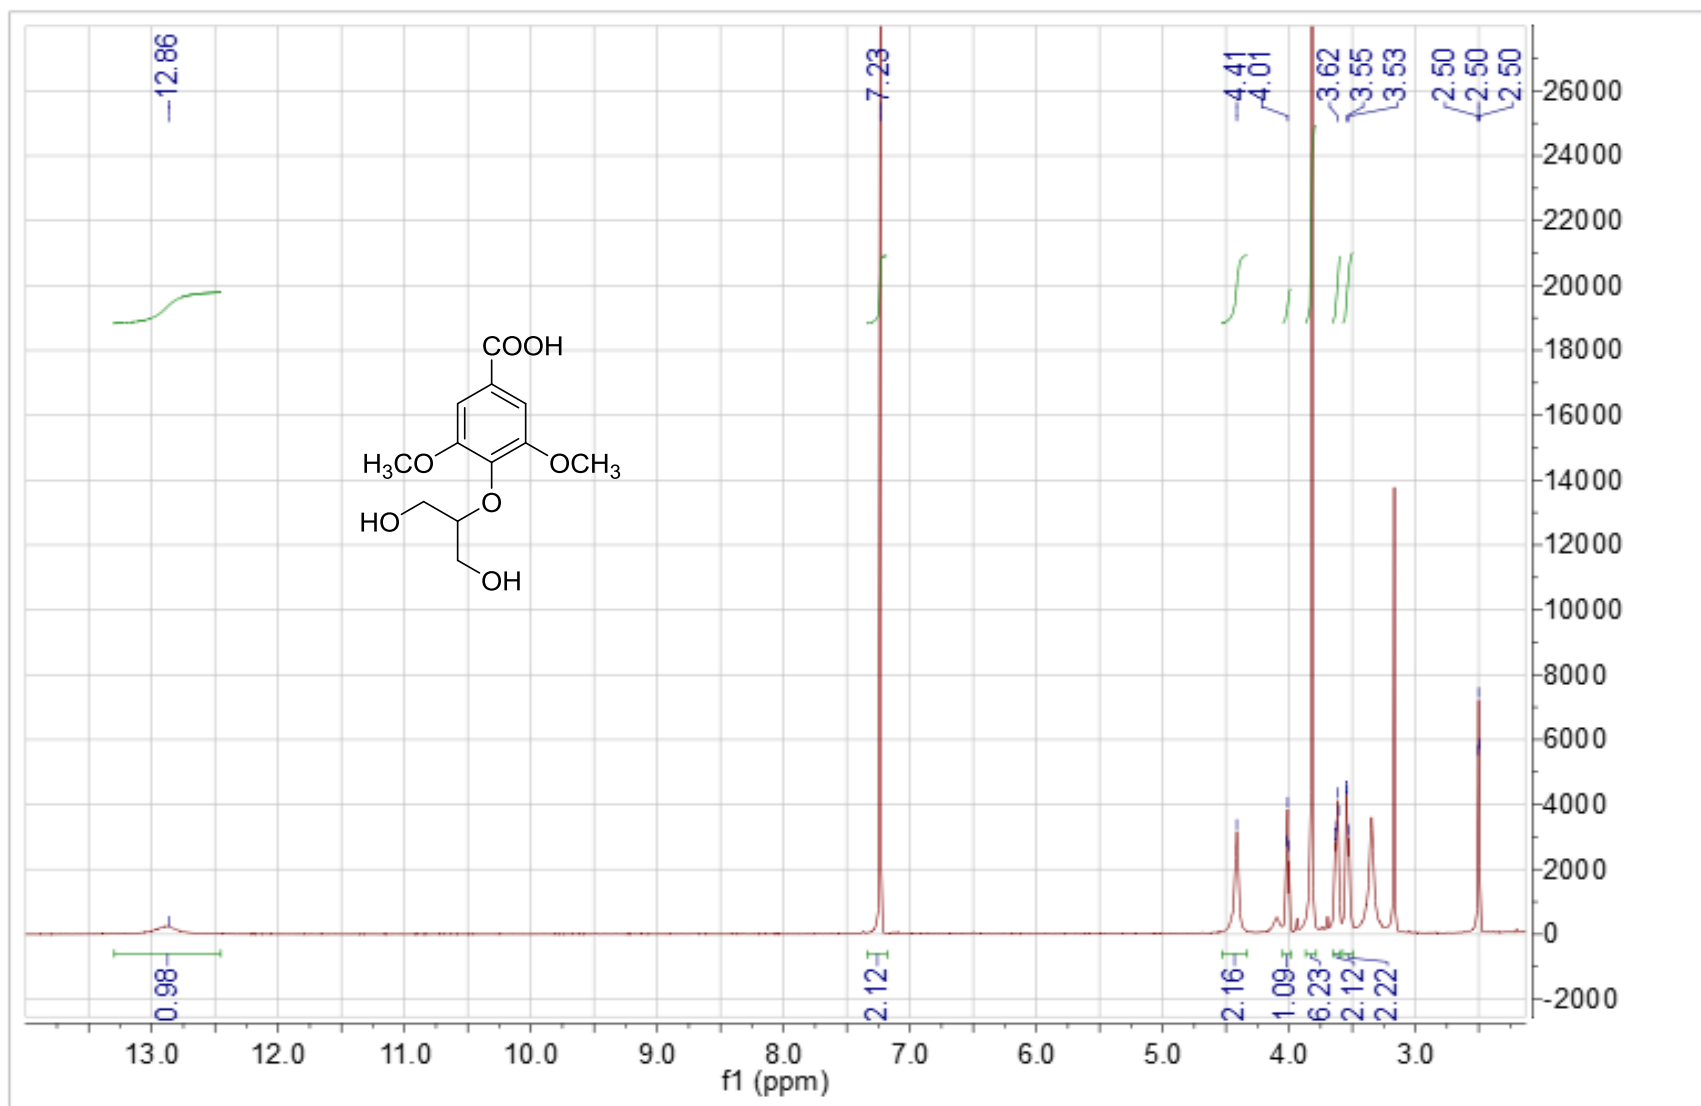

Figure S11. The  $^1\text{H}$  NMR spectrum of **2** (in  $\text{DMSO-}d_6$ )



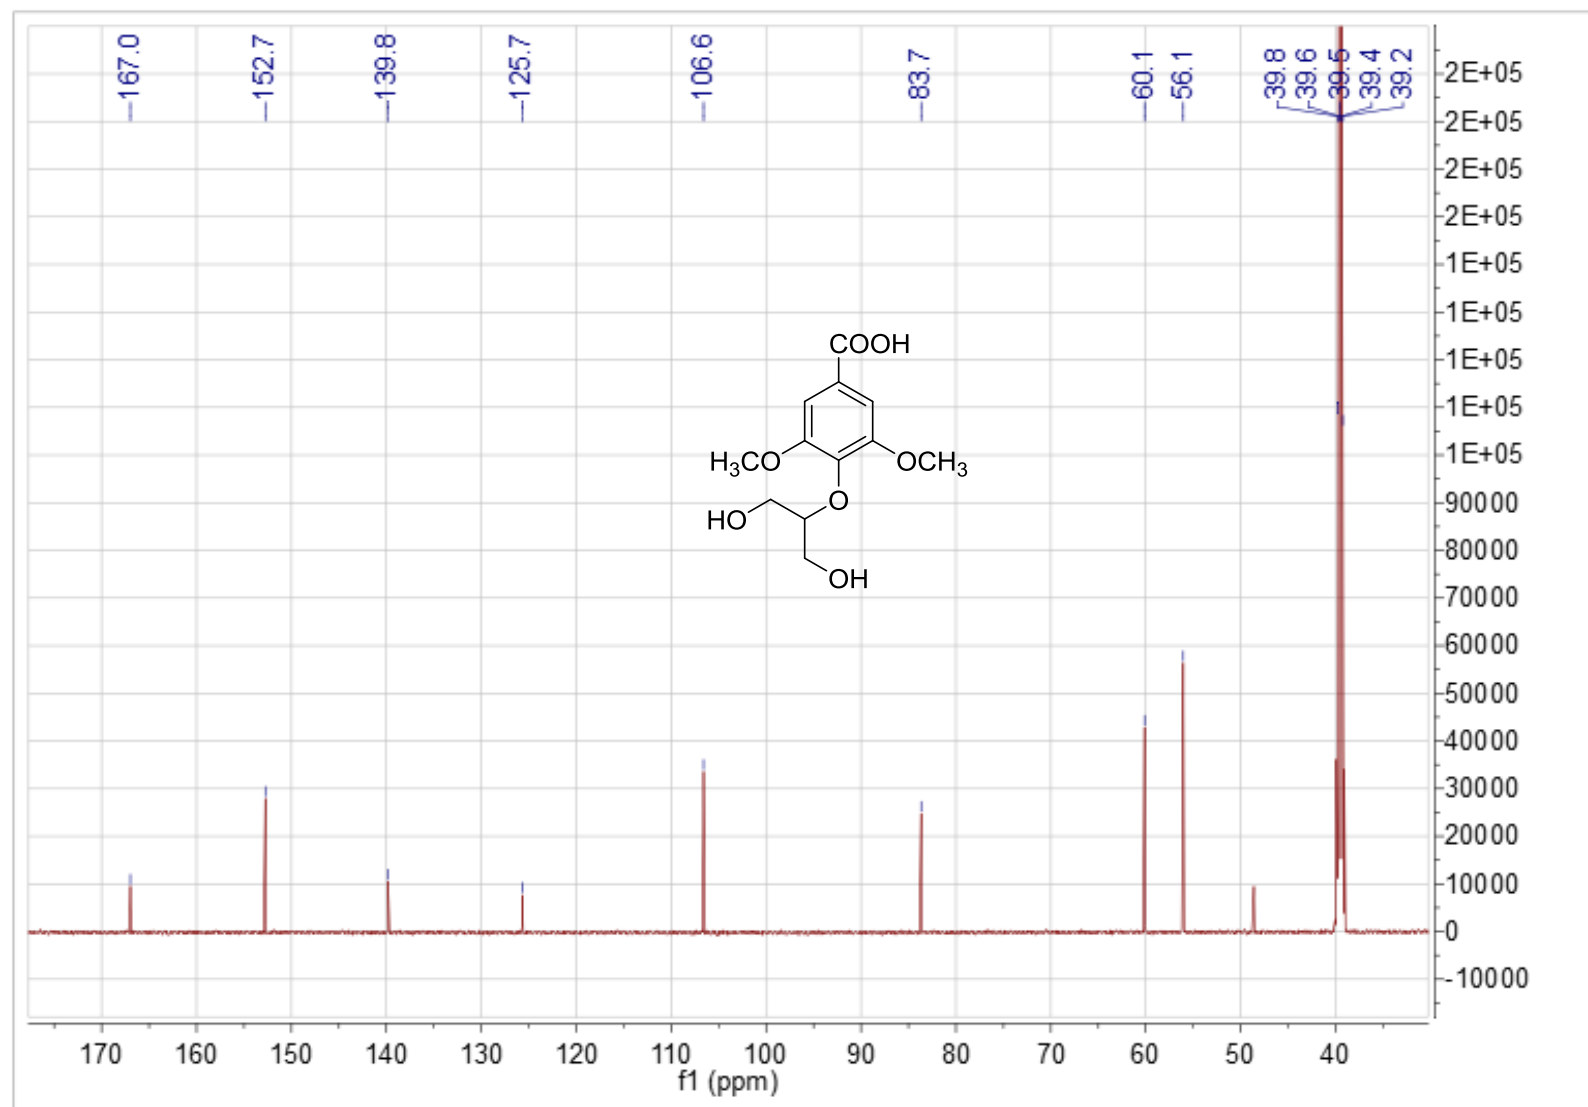

Figure S12. The  $^{13}\text{C}$  NMR spectrum of **2** (in  $\text{DMSO-}d_6$ )

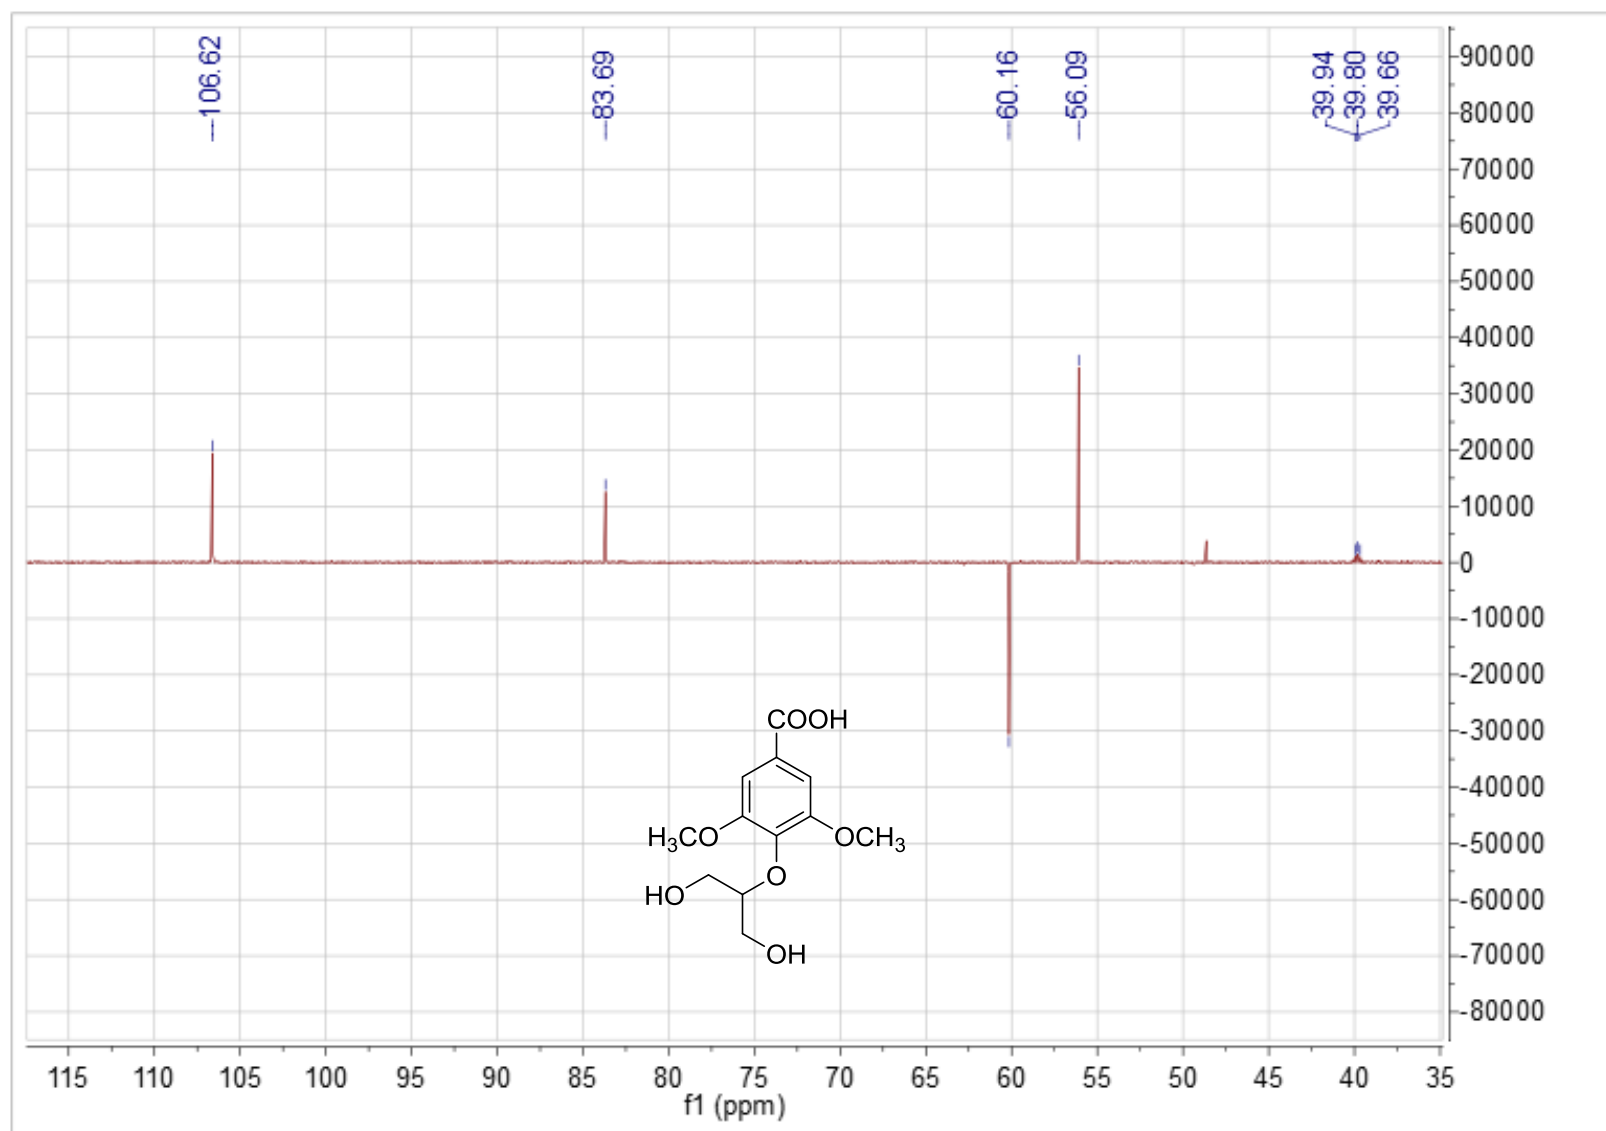

Figure S13. The DEPT 135 spectrum of **2** (in DMSO-*d*<sub>6</sub>)

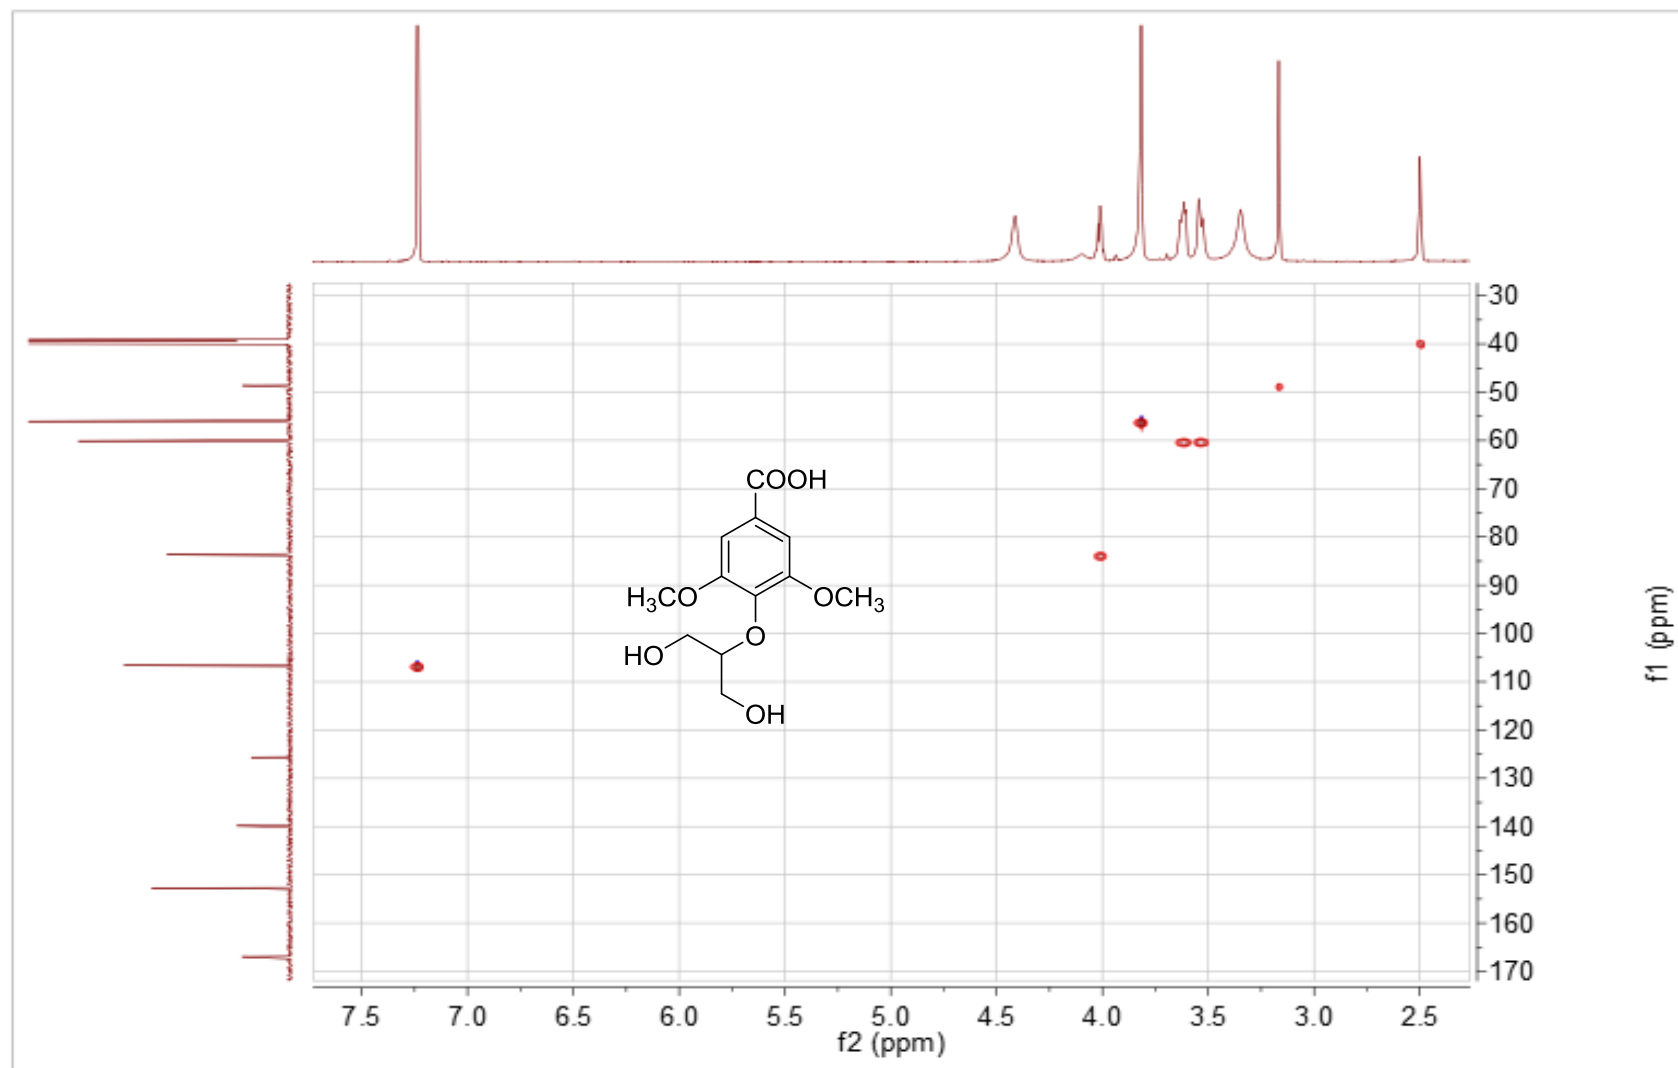

Figure S14. The HSQC spectrum of **2** (in DMSO-*d*<sub>6</sub>)

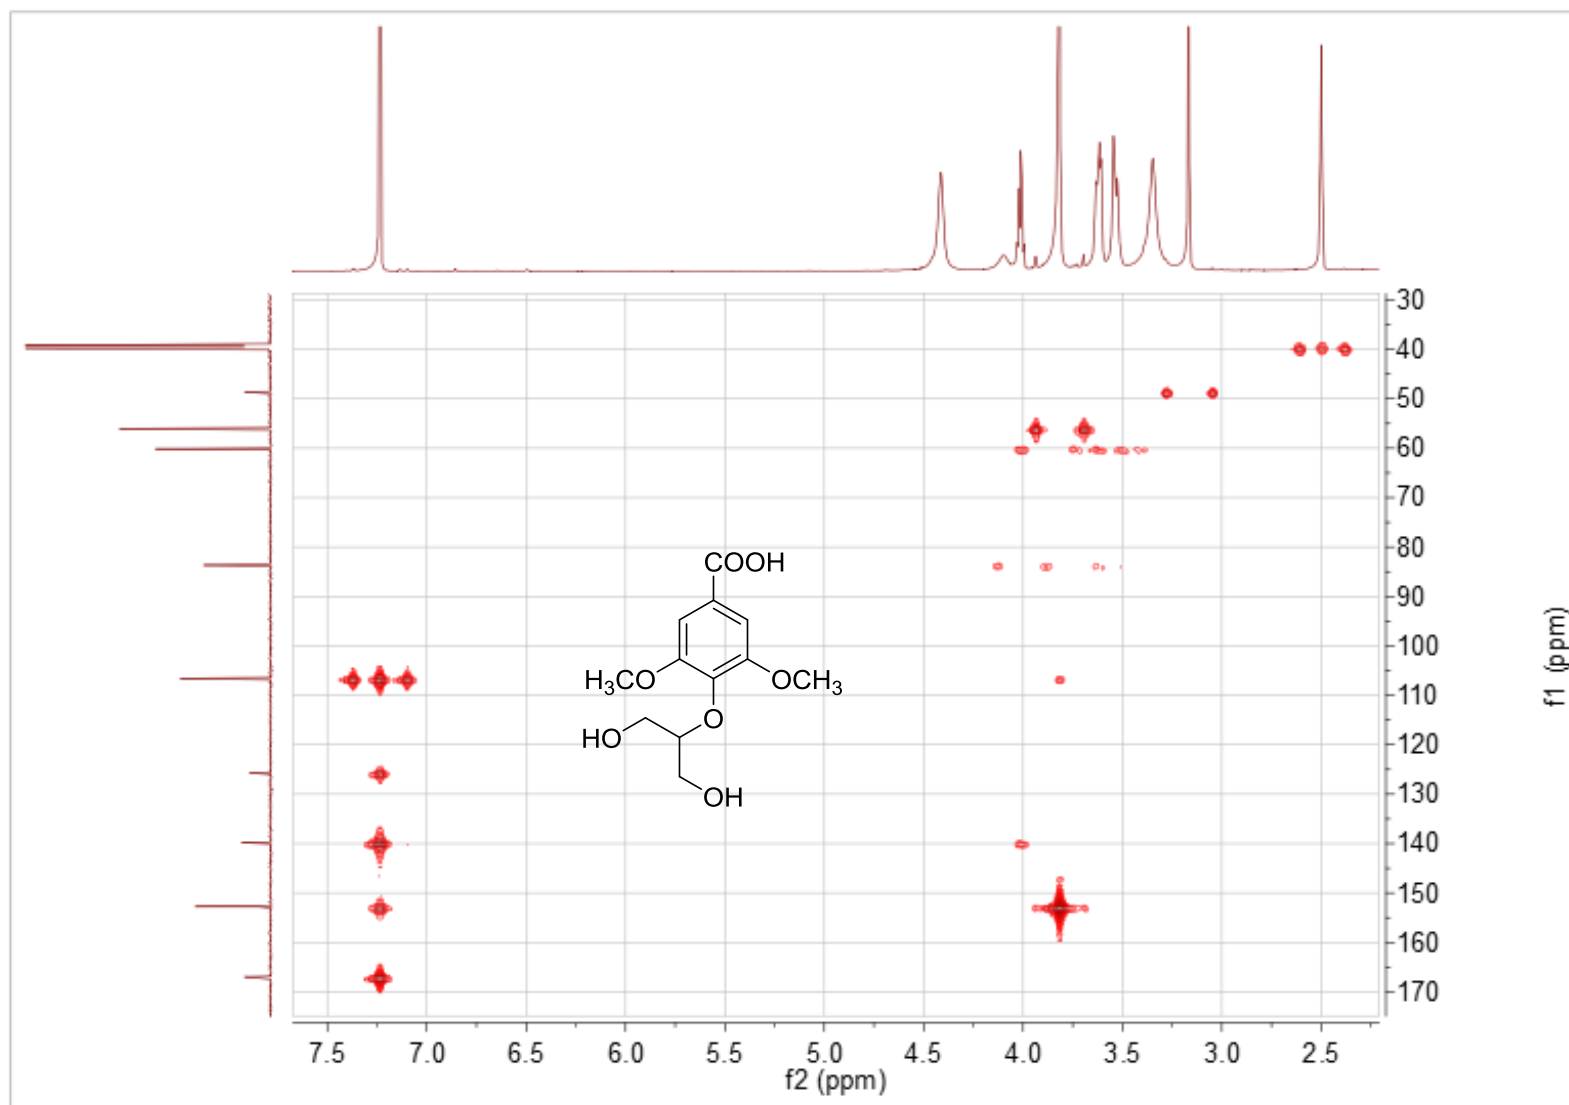

Figure S15. The HMBC spectrum of **2** (in DMSO-*d*<sub>6</sub>)

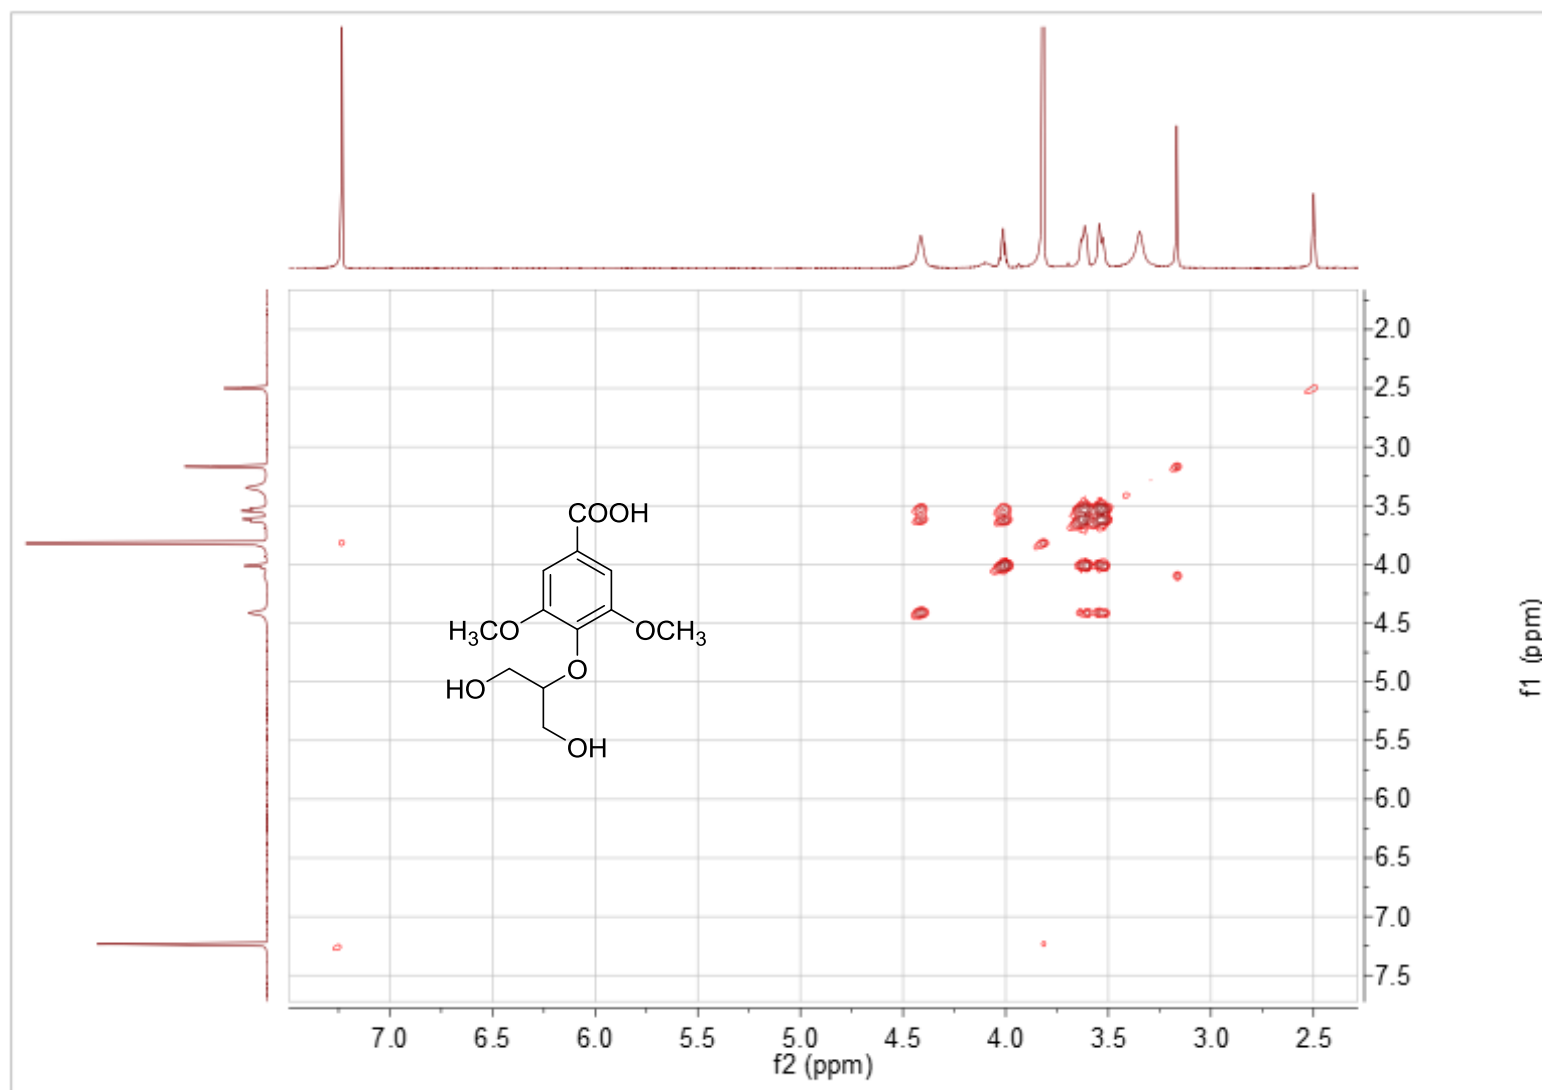

Figure S16. The  $^1\text{H}$ - $^1\text{H}$  COSY spectrum of **2** (in  $\text{DMSO-}d_6$ )

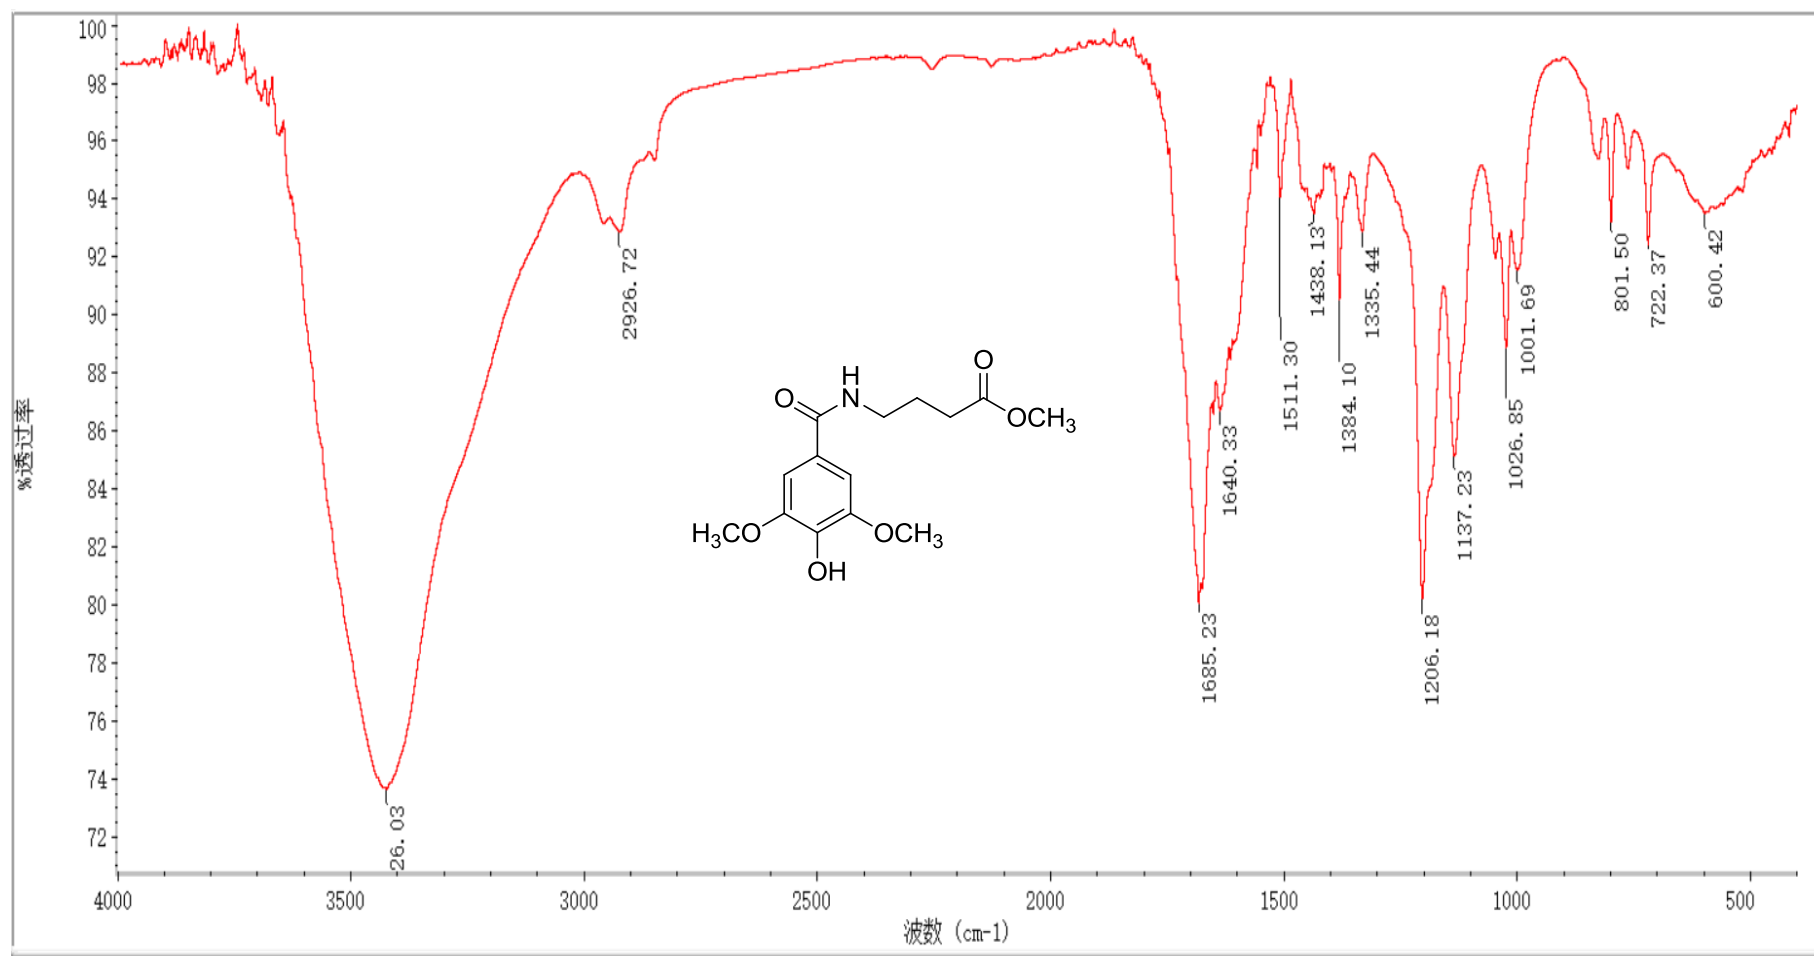

Figure S17. The IR spectrum of **3** (in KBr)

## Qualitative Analysis Report

|                 |                                        |                        |                              |
|-----------------|----------------------------------------|------------------------|------------------------------|
| Data Filename   | ESI_H_20191108_ZWL_LZH_03.d            | Sample Name            | KM-48                        |
| Sample Type     | Sample                                 | Position               | P1-A3                        |
| Instrument Name | Agilent G6520 Q-TOF                    | Acq Method             | 20160322_MS_ESI_H_POS_1min.m |
| Acquired Time   | 11/8/2019 10:23:07                     | IRM Calibration Status | Success                      |
| DA Method       | small molecular data analysis method.m | Comment                | ESI_H by ZZY                 |

### User Spectra

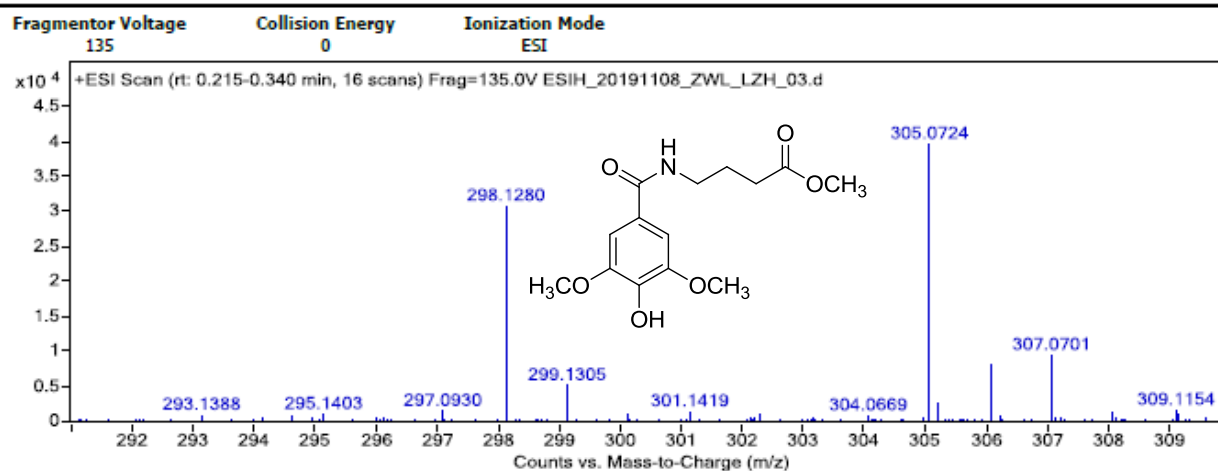

### Formula Calculator Results

| m/z     | Calc m/z | Diff (mDa) | Diff (ppm) | Ion Formula                                      | Ion                |
|---------|----------|------------|------------|--------------------------------------------------|--------------------|
| 298.128 | 298.1285 | 0.52       | 1.73       | C <sub>14</sub> H <sub>20</sub> N O <sub>6</sub> | (M+H) <sup>+</sup> |

--- End Of Report ---

Figure S18. The HRESIMS spectrum of **3** (in MeOH)

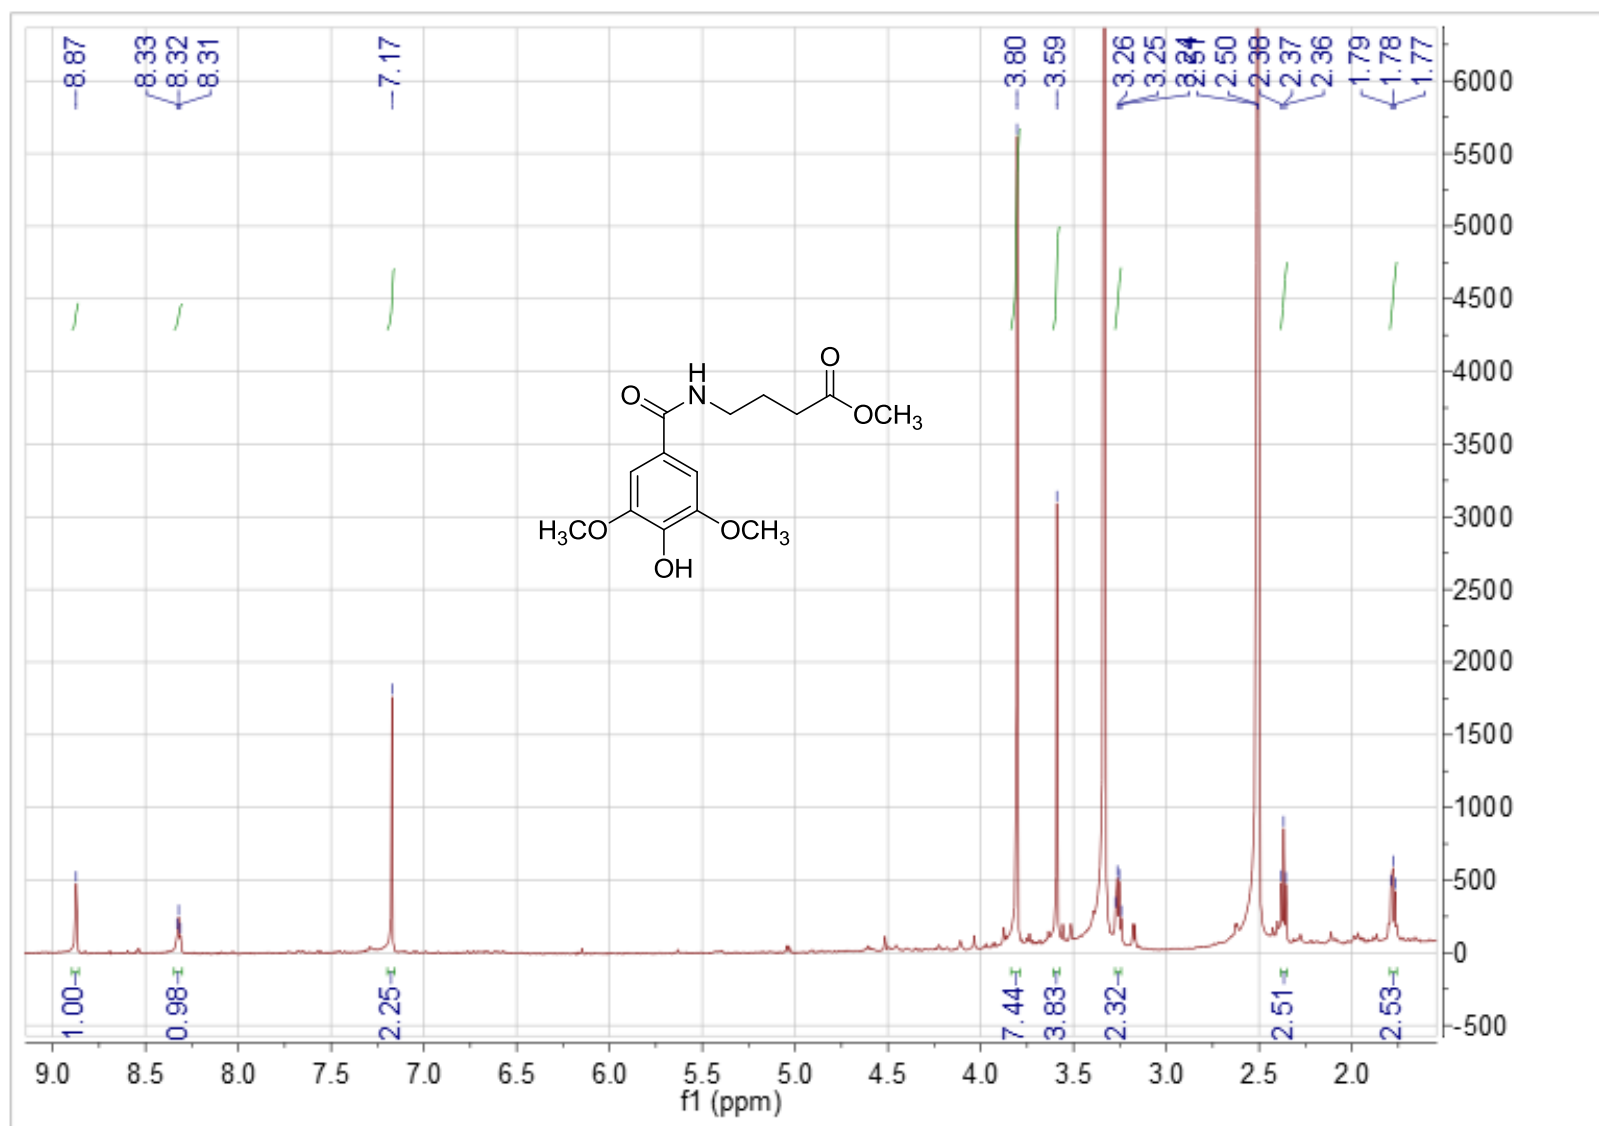

Figure S19. The <sup>1</sup>H NMR spectrum of **3** (in DMSO-*d*<sub>6</sub>)



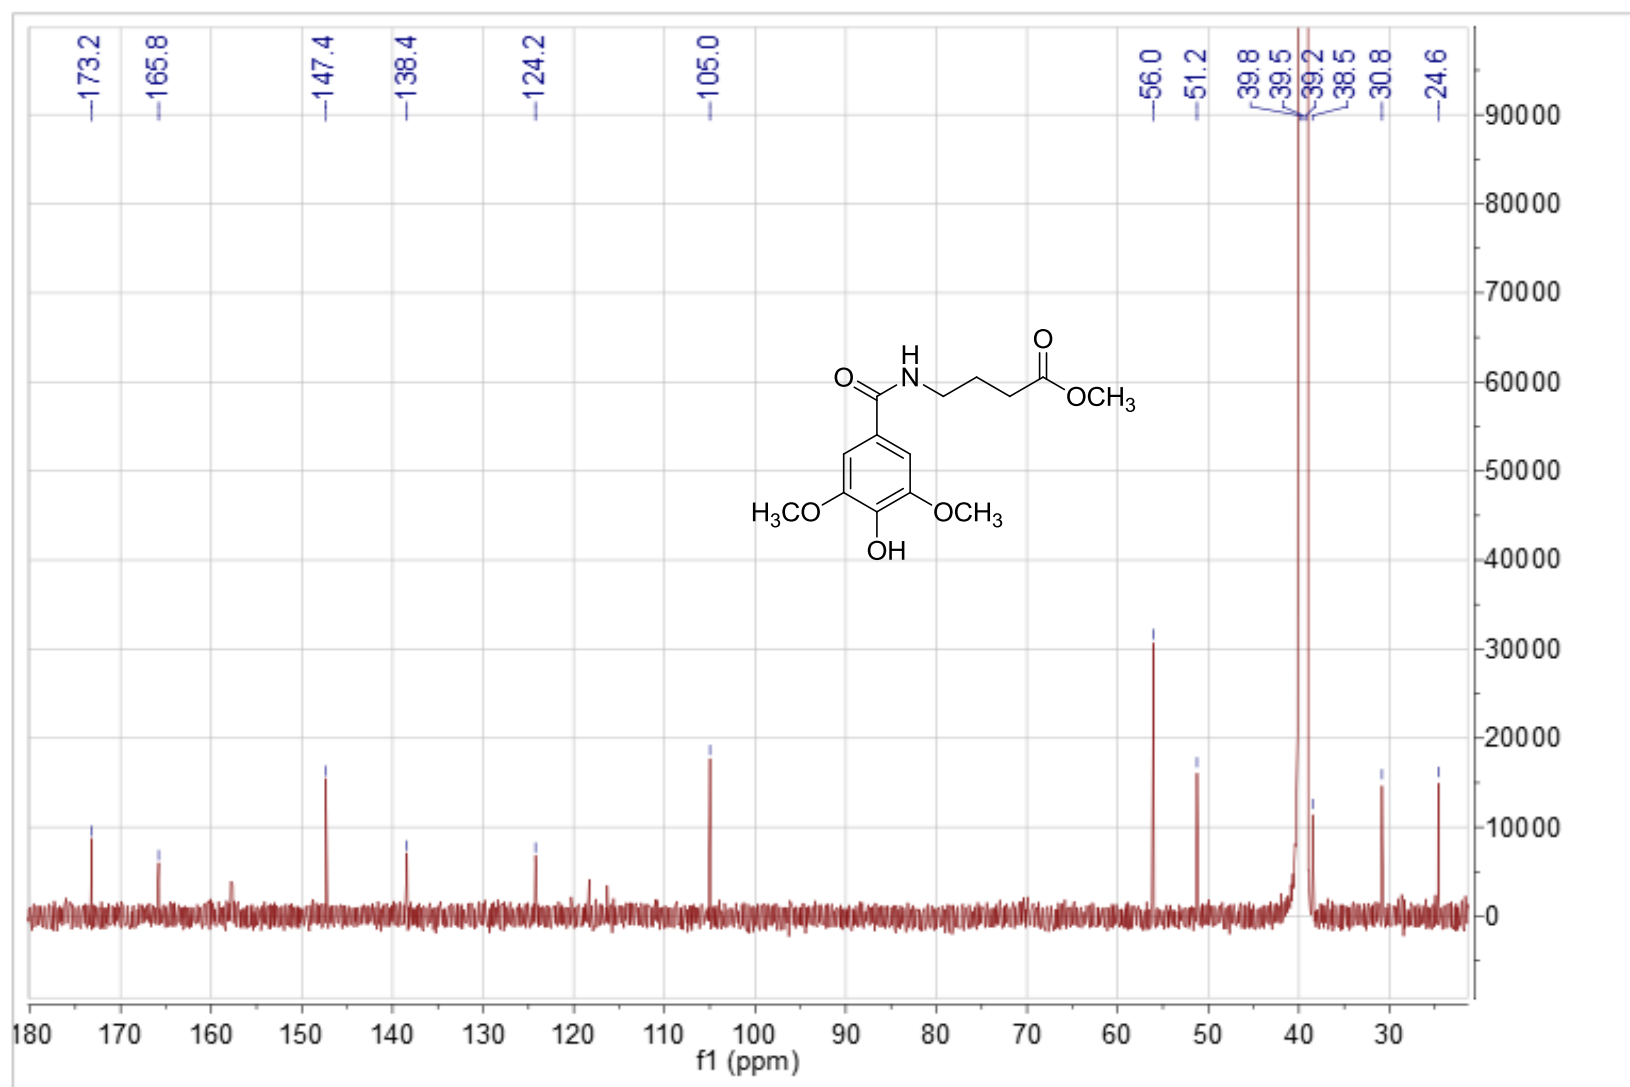

Figure S20. The <sup>13</sup>C NMR spectrum of **3** (in DMSO-*d*<sub>6</sub>)

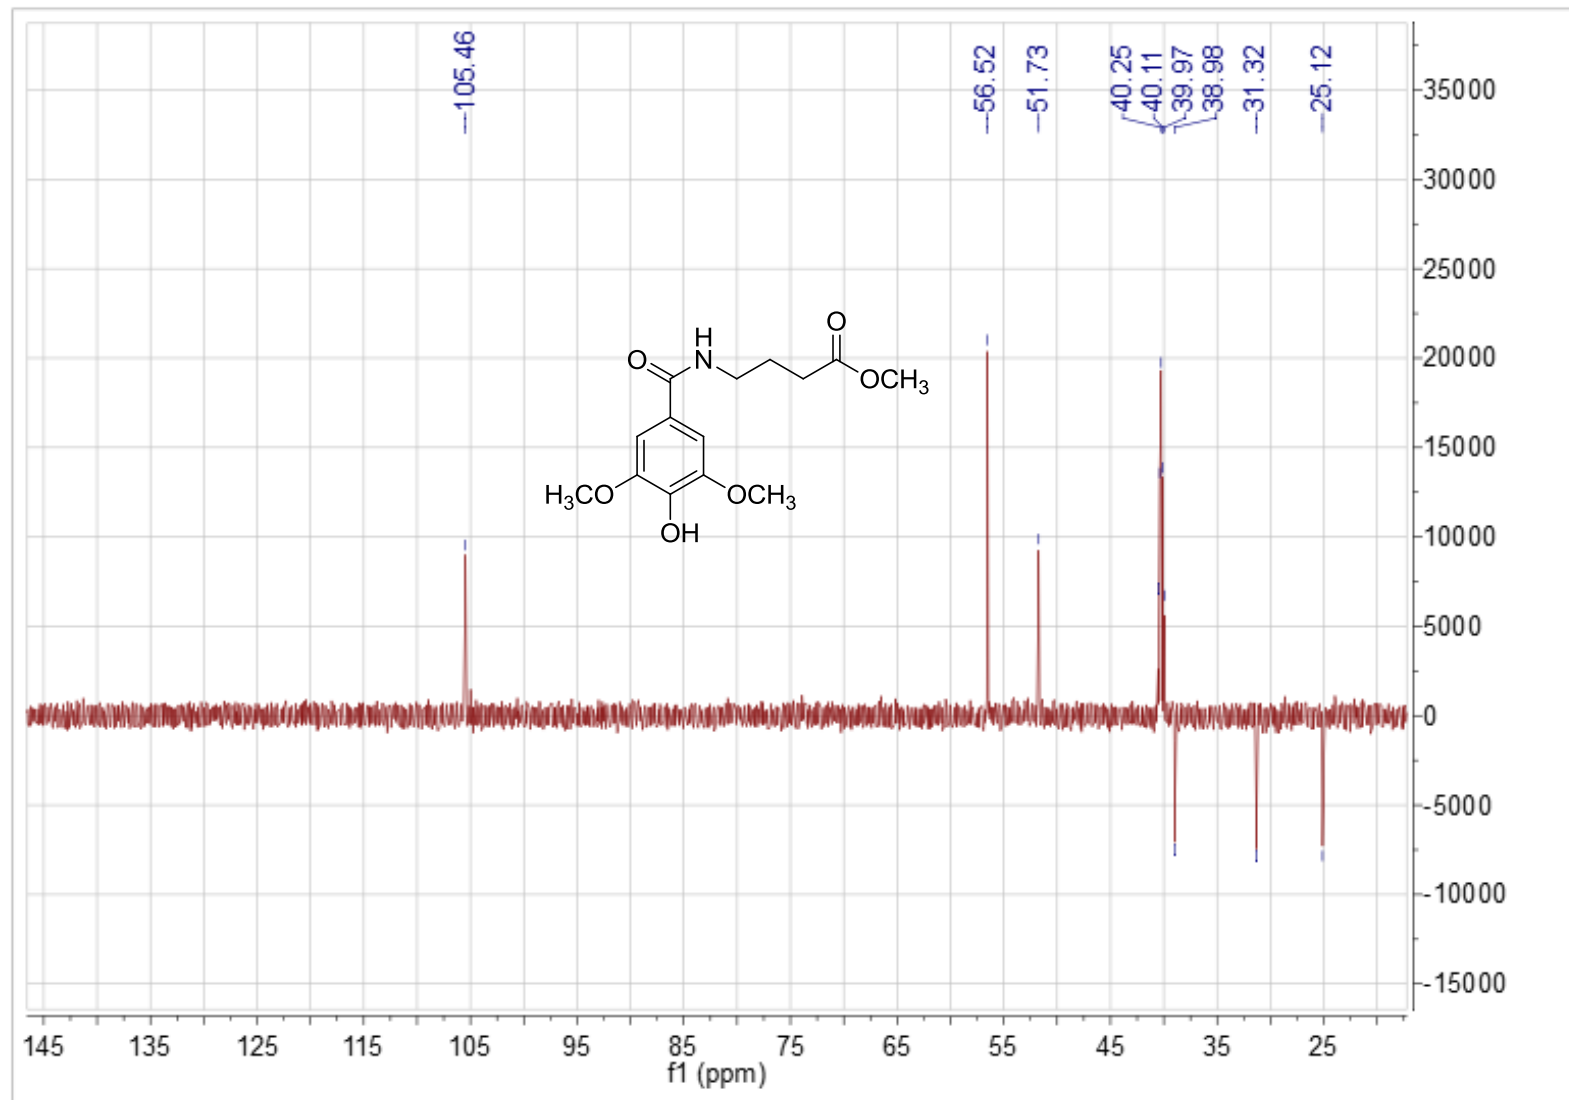

Figure S21. The DEPT 135 spectrum of **3** (in DMSO-*d*<sub>6</sub>)

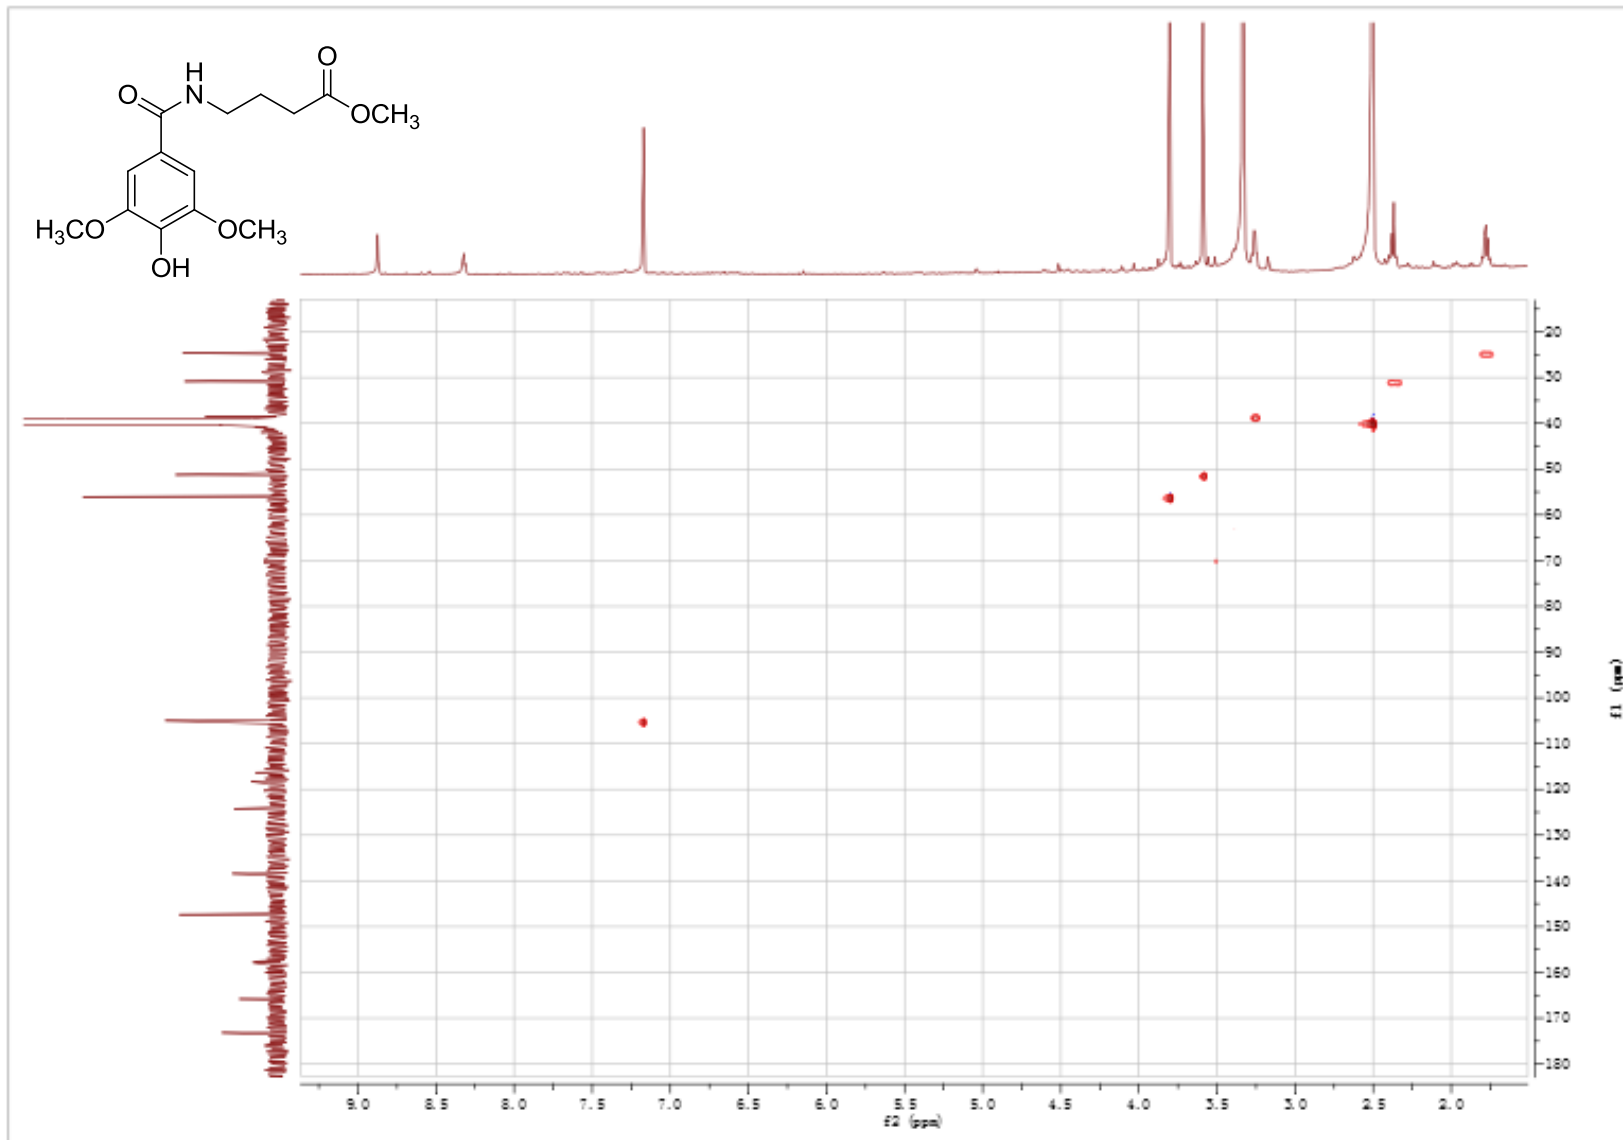

Figure S22. The HSQC spectrum of **3** (in DMSO- $d_6$ )

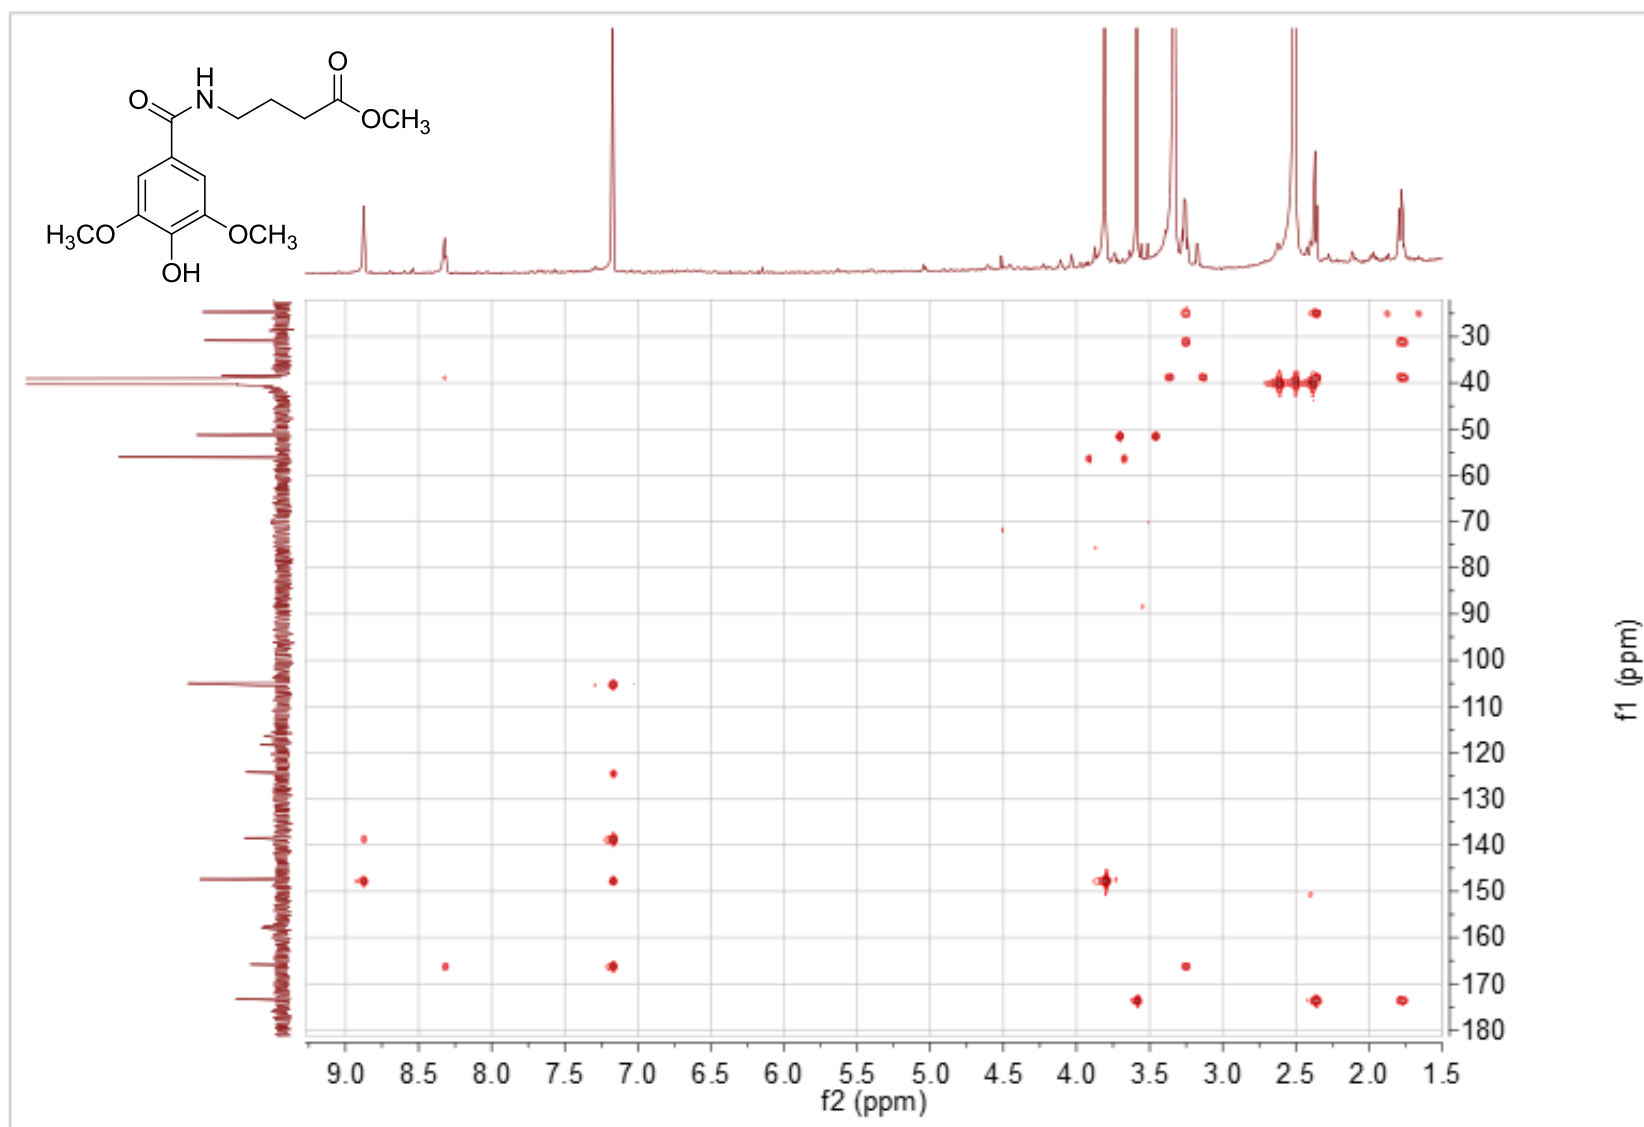

Figure S23. The HMBC spectrum of **3** (in DMSO- $d_6$ )

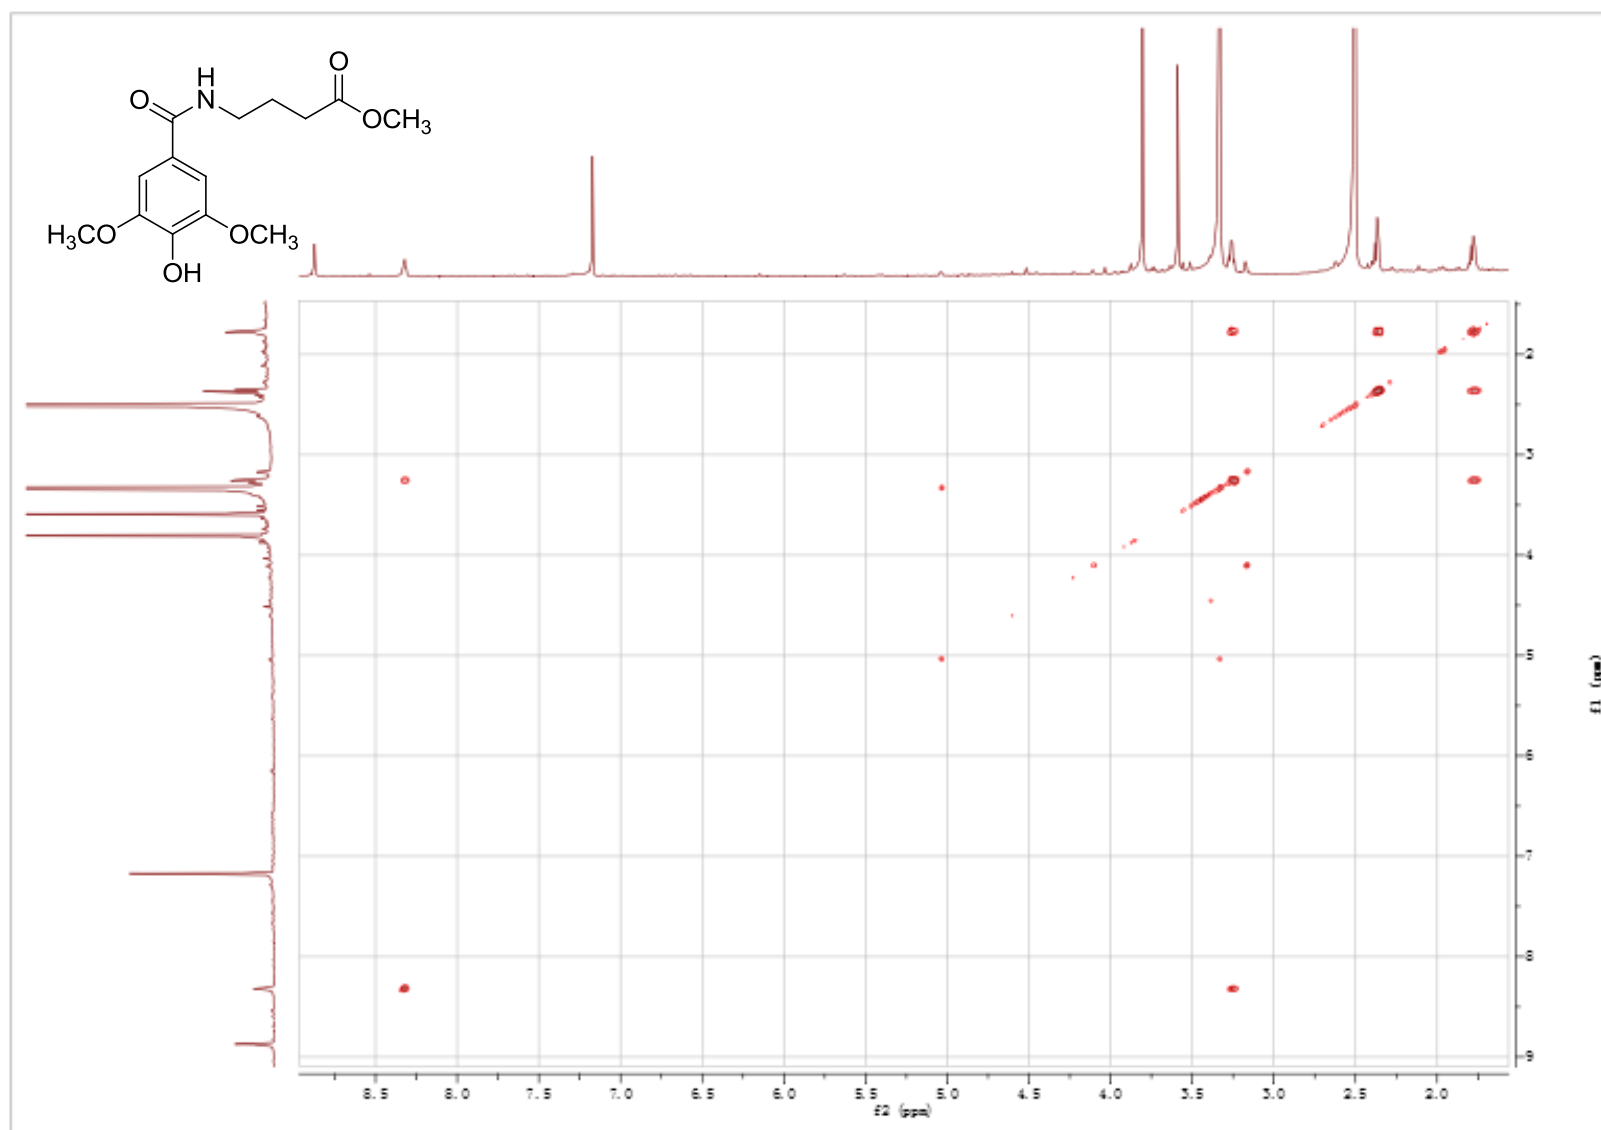

Figure S24. The  $^1\text{H}$ - $^1\text{H}$  COSY spectrum of **3** (in  $\text{DMSO}-d_6$ )

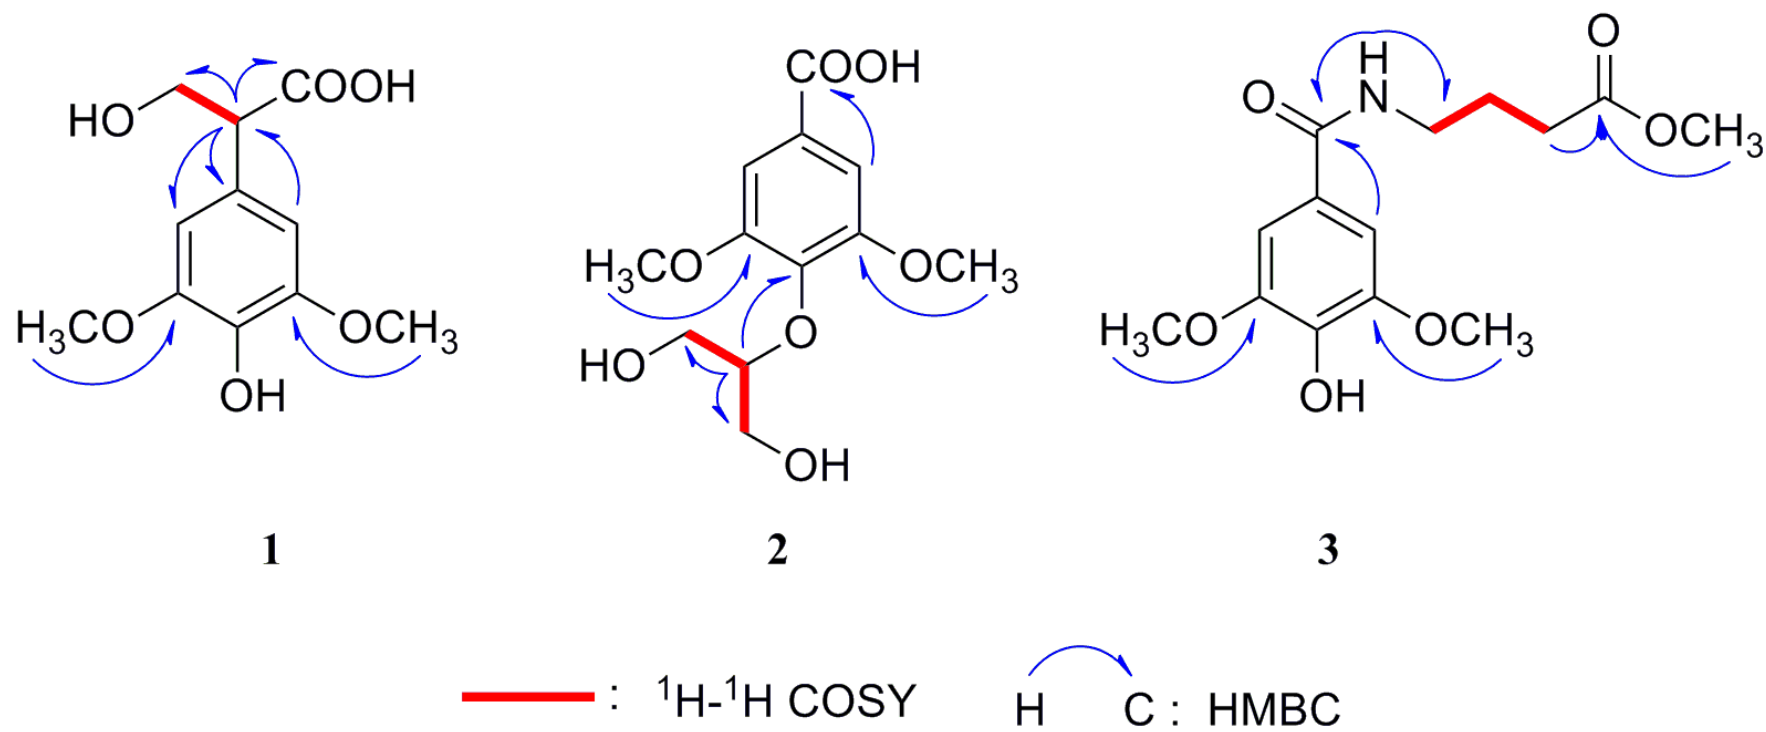

Figure S25. The Key  $^1\text{H}$ - $^1\text{H}$  COSY and HMBC correlations of **1** - **3**

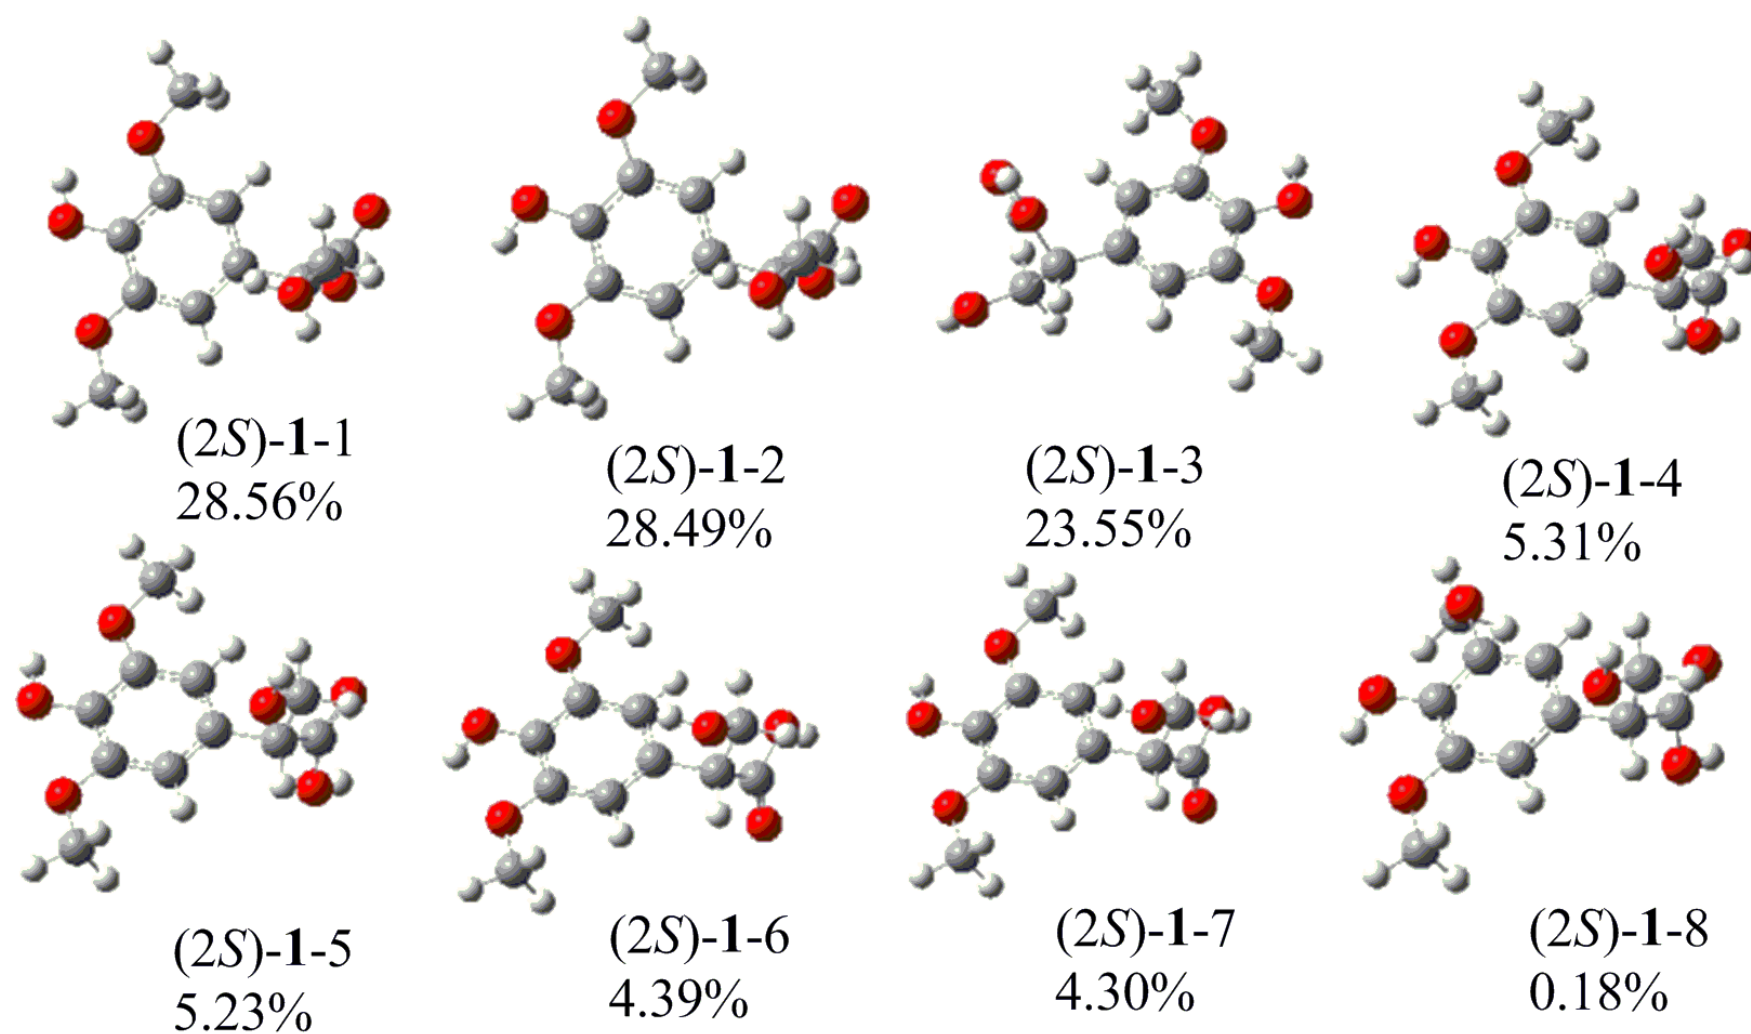

Figure S26. b3lyp/6-31g(d) optimized lowest energy conformers for (2*S*)-1 and their equilibrium populations

The experimental ECD spectrum of **1** (red line) and the calculated ECD spectrum of (2*S*)-**1** (red short dash) and (2*R*)-**1** (blue short dash). The calculated ECD (excited states 30) spectrum were plotted as sums of Gaussians 09 with a 0.30 eV exponential half-width using the program Specdis 1.62, and the UV shifted was 17 nm.

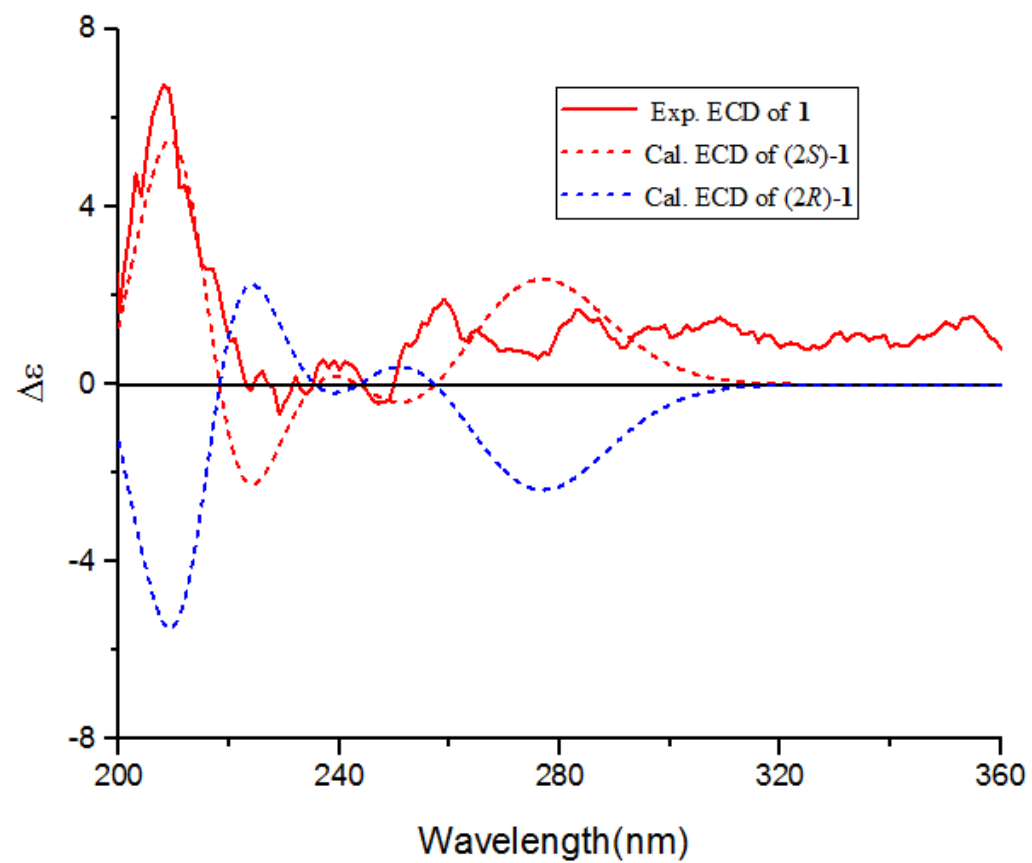

Figure S27. Experimental and calculated ECD spectra of **1**



Table S1  $^1\text{H}$  and  $^{13}\text{C}$  NMR data of **1** (600 and 150 MHz in  $\text{DMSO-}d_6$ ).

| No.      | $\delta_{\text{H}}$ ( $J$ in Hz)                      | $\delta_{\text{C}}$ |
|----------|-------------------------------------------------------|---------------------|
| 1'       | 3.89 (1H, dd, $J = 10.5, 8.6$ Hz), 3.52 (1H, overlap) | 63.7                |
| 2'       | 3.50 (1H, overlap)                                    | 54.2                |
| 1        |                                                       | 126.9               |
| 2, 6     | 6.52 (2H, s)                                          | 105.5               |
| 3, 5     |                                                       | 147.8               |
| 4        |                                                       | 134.8               |
| 2'-COOH  | 12.23 (1H, brs)                                       | 174.0               |
| 3, 5-OMe | 3.72 (6H, s)                                          | 56.0                |
| 4-OH     | 8.26 (1H, s)                                          |                     |

Table S2  $^1\text{H}$  and  $^{13}\text{C}$  NMR data of **2** (600 and 150 MHz in DMSO- $d_6$ ).

| No.      | $\delta_{\text{H}}$ ( $J$ in Hz) | $\delta_{\text{C}}$ |
|----------|----------------------------------|---------------------|
| 1        |                                  | 125.7               |
| 2, 6     | 7.23 (2H, s)                     | 106.6               |
| 3, 5     |                                  | 152.7               |
| 4        |                                  | 139.8               |
| 1', 3'   | 3.53~3.63 (4H, overlap)          | 60.1                |
| 2'       | 4.01 (1H, m)                     | 83.4                |
| 3, 5-OMe | 3.82 (6H, s)                     | 56.1                |
| 1-COOH   | 12.86 (1H, s)                    | 167.0               |

---

|           |              |
|-----------|--------------|
| 1', 3'-OH | 4.41 (2H, s) |
|-----------|--------------|

---

Table S3  $^1\text{H}$  and  $^{13}\text{C}$  NMR data of **3** (600 and 150 MHz in  $\text{DMSO-}d_6$ ).

| No.      | $\delta_{\text{H}}$ ( $J$ in Hz) | $\delta_{\text{C}}$ |
|----------|----------------------------------|---------------------|
| 1        |                                  | 124.2               |
| 2, 6     | 7.17 (2H, s)                     | 105.0               |
| 3, 5     |                                  | 147.4               |
| 4        |                                  | 138.4               |
| 7        |                                  | 173.2               |
| 1'       |                                  | 165.8               |
| 2'       | 2.36 (2H, m)                     | 30.8                |
| 3'       | 1.78 (2H, m)                     | 24.6                |
| 4'       | 3.25 (2H, m)                     | 38.5                |
| 1'-OMe   | 3.59 (3H, s )                    | 51.2                |
| 3, 5-OMe | 3.80 (6H, s)                     | 56.0                |
| 4-OH     | 8.87 (1H, s)                     |                     |
| NH       | 8.32 (1H, t, $J = 5.5$ Hz)       |                     |
